# Supplementary material for: Comparing two models that reduce the number of nephrology fellowship positions in the United States
Source: PeerJ. 2015 Jan 8;3:e720. doi: 10.7717/peerj.720 (PMC4304863; doi:10.7717/peerj.720)
Supplement: Table S1 [file peerj-03-720-s001.xlsx]

## Sheet: Priority Values (47 reduction)
maximum priority score
	Round	Alabama	Alaska	Arizona	Arkansas	California	Colorado	Connecticut	Delaware	District of Columbia	Florida	Georgia	Hawaii	Idaho	Illinois	Indiana	Iowa	Kansas	Kentucky	Louisiana	Maine	Maryland	Massachusetts	Michigan	Minnesota	Mississippi	Missouri	Montana	Nebraska	Nevada	New Hampshire	New Jersey	New Mexico	New York	North Carolina	North Dakota	Ohio	Oklahoma	Oregon	Pennsylvania	Rhode Island	South Carolina	South Dakota	Tennessee	Texas	Utah	Vermont	Virginia	Washington
0	1	N/A	N/A	N/A	N/A	N/A	N/A	N/A	N/A	N/A	N/A	N/A	N/A	N/A	N/A	N/A	N/A	N/A	N/A	N/A	N/A	N/A	N/A	N/A	N/A	N/A	N/A	N/A	N/A	N/A	N/A	N/A	N/A	N/A	N/A	N/A	N/A	N/A	N/A	N/A	N/A	N/A	N/A	N/A	N/A	N/A	N/A	N/A	N/A
55711.5	2	7720.19	573.464	8544.68	3652.91	55711.5	4529.73	4077.88	1464.42	1703.42	24769.2	15583.9	2583.06	1405.73	19688	8232.84	3288.05	3015.81	5238.95	7937.27	1218.34	9705.04	7182.08	14705	6008.99	5668.17	7929.5	908.632	2021.62	3101.37	1134.91	12992.4	2940.15	27875.6	14455.4	789.838	16600.7	4516.29	3908.18	17603.4	1125.71	7672.82	966.615	9070.06	37292.1	2196.98	573.464	11293.9	6928.94
37292.1	3	7720.19	573.464	8544.68	3652.91	32165.1	4529.73	4077.88	1464.42	1703.42	24769.2	15583.9	2583.06	1405.73	19688	8232.84	3288.05	3015.81	5238.95	7937.27	1218.34	9705.04	7182.08	14705	6008.99	5668.17	7929.5	908.632	2021.62	3101.37	1134.91	12992.4	2940.15	27875.6	14455.4	789.838	16600.7	4516.29	3908.18	17603.4	1125.71	7672.82	966.615	9070.06	37292.1	2196.98	573.464	11293.9	6928.94
32165.1	4	7720.19	573.464	8544.68	3652.91	32165.1	4529.73	4077.88	1464.42	1703.42	24769.2	15583.9	2583.06	1405.73	19688	8232.84	3288.05	3015.81	5238.95	7937.27	1218.34	9705.04	7182.08	14705	6008.99	5668.17	7929.5	908.632	2021.62	3101.37	1134.91	12992.4	2940.15	27875.6	14455.4	789.838	16600.7	4516.29	3908.18	17603.4	1125.71	7672.82	966.615	9070.06	21530.6	2196.98	573.464	11293.9	6928.94
27875.6	5	7720.19	573.464	8544.68	3652.91	22744.1	4529.73	4077.88	1464.42	1703.42	24769.2	15583.9	2583.06	1405.73	19688	8232.84	3288.05	3015.81	5238.95	7937.27	1218.34	9705.04	7182.08	14705	6008.99	5668.17	7929.5	908.632	2021.62	3101.37	1134.91	12992.4	2940.15	27875.6	14455.4	789.838	16600.7	4516.29	3908.18	17603.4	1125.71	7672.82	966.615	9070.06	21530.6	2196.98	573.464	11293.9	6928.94
24769.2	6	7720.19	573.464	8544.68	3652.91	22744.1	4529.73	4077.88	1464.42	1703.42	24769.2	15583.9	2583.06	1405.73	19688	8232.84	3288.05	3015.81	5238.95	7937.27	1218.34	9705.04	7182.08	14705	6008.99	5668.17	7929.5	908.632	2021.62	3101.37	1134.91	12992.4	2940.15	16094	14455.4	789.838	16600.7	4516.29	3908.18	17603.4	1125.71	7672.82	966.615	9070.06	21530.6	2196.98	573.464	11293.9	6928.94
22744.1	7	7720.19	573.464	8544.68	3652.91	22744.1	4529.73	4077.88	1464.42	1703.42	14300.5	15583.9	2583.06	1405.73	19688	8232.84	3288.05	3015.81	5238.95	7937.27	1218.34	9705.04	7182.08	14705	6008.99	5668.17	7929.5	908.632	2021.62	3101.37	1134.91	12992.4	2940.15	16094	14455.4	789.838	16600.7	4516.29	3908.18	17603.4	1125.71	7672.82	966.615	9070.06	21530.6	2196.98	573.464	11293.9	6928.94
21530.6	8	7720.19	573.464	8544.68	3652.91	17617.5	4529.73	4077.88	1464.42	1703.42	14300.5	15583.9	2583.06	1405.73	19688	8232.84	3288.05	3015.81	5238.95	7937.27	1218.34	9705.04	7182.08	14705	6008.99	5668.17	7929.5	908.632	2021.62	3101.37	1134.91	12992.4	2940.15	16094	14455.4	789.838	16600.7	4516.29	3908.18	17603.4	1125.71	7672.82	966.615	9070.06	21530.6	2196.98	573.464	11293.9	6928.94
19688	9	7720.19	573.464	8544.68	3652.91	17617.5	4529.73	4077.88	1464.42	1703.42	14300.5	15583.9	2583.06	1405.73	19688	8232.84	3288.05	3015.81	5238.95	7937.27	1218.34	9705.04	7182.08	14705	6008.99	5668.17	7929.5	908.632	2021.62	3101.37	1134.91	12992.4	2940.15	16094	14455.4	789.838	16600.7	4516.29	3908.18	17603.4	1125.71	7672.82	966.615	9070.06	15224.4	2196.98	573.464	11293.9	6928.94
17617.5	10	7720.19	573.464	8544.68	3652.91	17617.5	4529.73	4077.88	1464.42	1703.42	14300.5	15583.9	2583.06	1405.73	11366.9	8232.84	3288.05	3015.81	5238.95	7937.27	1218.34	9705.04	7182.08	14705	6008.99	5668.17	7929.5	908.632	2021.62	3101.37	1134.91	12992.4	2940.15	16094	14455.4	789.838	16600.7	4516.29	3908.18	17603.4	1125.71	7672.82	966.615	9070.06	15224.4	2196.98	573.464	11293.9	6928.94
17603.4	11	7720.19	573.464	8544.68	3652.91	14384.7	4529.73	4077.88	1464.42	1703.42	14300.5	15583.9	2583.06	1405.73	11366.9	8232.84	3288.05	3015.81	5238.95	7937.27	1218.34	9705.04	7182.08	14705	6008.99	5668.17	7929.5	908.632	2021.62	3101.37	1134.91	12992.4	2940.15	16094	14455.4	789.838	16600.7	4516.29	3908.18	17603.4	1125.71	7672.82	966.615	9070.06	15224.4	2196.98	573.464	11293.9	6928.94
16600.7	12	7720.19	573.464	8544.68	3652.91	14384.7	4529.73	4077.88	1464.42	1703.42	14300.5	15583.9	2583.06	1405.73	11366.9	8232.84	3288.05	3015.81	5238.95	7937.27	1218.34	9705.04	7182.08	14705	6008.99	5668.17	7929.5	908.632	2021.62	3101.37	1134.91	12992.4	2940.15	16094	14455.4	789.838	16600.7	4516.29	3908.18	10163.3	1125.71	7672.82	966.615	9070.06	15224.4	2196.98	573.464	11293.9	6928.94
16094	13	7720.19	573.464	8544.68	3652.91	14384.7	4529.73	4077.88	1464.42	1703.42	14300.5	15583.9	2583.06	1405.73	11366.9	8232.84	3288.05	3015.81	5238.95	7937.27	1218.34	9705.04	7182.08	14705	6008.99	5668.17	7929.5	908.632	2021.62	3101.37	1134.91	12992.4	2940.15	16094	14455.4	789.838	9584.45	4516.29	3908.18	10163.3	1125.71	7672.82	966.615	9070.06	15224.4	2196.98	573.464	11293.9	6928.94
15583.9	14	7720.19	573.464	8544.68	3652.91	14384.7	4529.73	4077.88	1464.42	1703.42	14300.5	15583.9	2583.06	1405.73	11366.9	8232.84	3288.05	3015.81	5238.95	7937.27	1218.34	9705.04	7182.08	14705	6008.99	5668.17	7929.5	908.632	2021.62	3101.37	1134.91	12992.4	2940.15	11380.2	14455.4	789.838	9584.45	4516.29	3908.18	10163.3	1125.71	7672.82	966.615	9070.06	15224.4	2196.98	573.464	11293.9	6928.94
15224.4	15	7720.19	573.464	8544.68	3652.91	14384.7	4529.73	4077.88	1464.42	1703.42	14300.5	8997.38	2583.06	1405.73	11366.9	8232.84	3288.05	3015.81	5238.95	7937.27	1218.34	9705.04	7182.08	14705	6008.99	5668.17	7929.5	908.632	2021.62	3101.37	1134.91	12992.4	2940.15	11380.2	14455.4	789.838	9584.45	4516.29	3908.18	10163.3	1125.71	7672.82	966.615	9070.06	15224.4	2196.98	573.464	11293.9	6928.94
14705	16	7720.19	573.464	8544.68	3652.91	14384.7	4529.73	4077.88	1464.42	1703.42	14300.5	8997.38	2583.06	1405.73	11366.9	8232.84	3288.05	3015.81	5238.95	7937.27	1218.34	9705.04	7182.08	14705	6008.99	5668.17	7929.5	908.632	2021.62	3101.37	1134.91	12992.4	2940.15	11380.2	14455.4	789.838	9584.45	4516.29	3908.18	10163.3	1125.71	7672.82	966.615	9070.06	11792.8	2196.98	573.464	11293.9	6928.94
14455.4	17	7720.19	573.464	8544.68	3652.91	14384.7	4529.73	4077.88	1464.42	1703.42	14300.5	8997.38	2583.06	1405.73	11366.9	8232.84	3288.05	3015.81	5238.95	7937.27	1218.34	9705.04	7182.08	8489.93	6008.99	5668.17	7929.5	908.632	2021.62	3101.37	1134.91	12992.4	2940.15	11380.2	14455.4	789.838	9584.45	4516.29	3908.18	10163.3	1125.71	7672.82	966.615	9070.06	11792.8	2196.98	573.464	11293.9	6928.94
14384.7	18	7720.19	573.464	8544.68	3652.91	14384.7	4529.73	4077.88	1464.42	1703.42	14300.5	8997.38	2583.06	1405.73	11366.9	8232.84	3288.05	3015.81	5238.95	7937.27	1218.34	9705.04	7182.08	8489.93	6008.99	5668.17	7929.5	908.632	2021.62	3101.37	1134.91	12992.4	2940.15	11380.2	8345.82	789.838	9584.45	4516.29	3908.18	10163.3	1125.71	7672.82	966.615	9070.06	11792.8	2196.98	573.464	11293.9	6928.94
14300.5	19	7720.19	573.464	8544.68	3652.91	12157.3	4529.73	4077.88	1464.42	1703.42	14300.5	8997.38	2583.06	1405.73	11366.9	8232.84	3288.05	3015.81	5238.95	7937.27	1218.34	9705.04	7182.08	8489.93	6008.99	5668.17	7929.5	908.632	2021.62	3101.37	1134.91	12992.4	2940.15	11380.2	8345.82	789.838	9584.45	4516.29	3908.18	10163.3	1125.71	7672.82	966.615	9070.06	11792.8	2196.98	573.464	11293.9	6928.94
12992.4	20	7720.19	573.464	8544.68	3652.91	12157.3	4529.73	4077.88	1464.42	1703.42	10112	8997.38	2583.06	1405.73	11366.9	8232.84	3288.05	3015.81	5238.95	7937.27	1218.34	9705.04	7182.08	8489.93	6008.99	5668.17	7929.5	908.632	2021.62	3101.37	1134.91	12992.4	2940.15	11380.2	8345.82	789.838	9584.45	4516.29	3908.18	10163.3	1125.71	7672.82	966.615	9070.06	11792.8	2196.98	573.464	11293.9	6928.94
12157.3	21	7720.19	573.464	8544.68	3652.91	12157.3	4529.73	4077.88	1464.42	1703.42	10112	8997.38	2583.06	1405.73	11366.9	8232.84	3288.05	3015.81	5238.95	7937.27	1218.34	9705.04	7182.08	8489.93	6008.99	5668.17	7929.5	908.632	2021.62	3101.37	1134.91	7501.15	2940.15	11380.2	8345.82	789.838	9584.45	4516.29	3908.18	10163.3	1125.71	7672.82	966.615	9070.06	11792.8	2196.98	573.464	11293.9	6928.94
11792.8	22	7720.19	573.464	8544.68	3652.91	10528.5	4529.73	4077.88	1464.42	1703.42	10112	8997.38	2583.06	1405.73	11366.9	8232.84	3288.05	3015.81	5238.95	7937.27	1218.34	9705.04	7182.08	8489.93	6008.99	5668.17	7929.5	908.632	2021.62	3101.37	1134.91	7501.15	2940.15	11380.2	8345.82	789.838	9584.45	4516.29	3908.18	10163.3	1125.71	7672.82	966.615	9070.06	11792.8	2196.98	573.464	11293.9	6928.94
11380.2	23	7720.19	573.464	8544.68	3652.91	10528.5	4529.73	4077.88	1464.42	1703.42	10112	8997.38	2583.06	1405.73	11366.9	8232.84	3288.05	3015.81	5238.95	7937.27	1218.34	9705.04	7182.08	8489.93	6008.99	5668.17	7929.5	908.632	2021.62	3101.37	1134.91	7501.15	2940.15	11380.2	8345.82	789.838	9584.45	4516.29	3908.18	10163.3	1125.71	7672.82	966.615	9070.06	9628.78	2196.98	573.464	11293.9	6928.94
11366.9	24	7720.19	573.464	8544.68	3652.91	10528.5	4529.73	4077.88	1464.42	1703.42	10112	8997.38	2583.06	1405.73	11366.9	8232.84	3288.05	3015.81	5238.95	7937.27	1218.34	9705.04	7182.08	8489.93	6008.99	5668.17	7929.5	908.632	2021.62	3101.37	1134.91	7501.15	2940.15	8815.03	8345.82	789.838	9584.45	4516.29	3908.18	10163.3	1125.71	7672.82	966.615	9070.06	9628.78	2196.98	573.464	11293.9	6928.94
11293.9	25	7720.19	573.464	8544.68	3652.91	10528.5	4529.73	4077.88	1464.42	1703.42	10112	8997.38	2583.06	1405.73	8037.58	8232.84	3288.05	3015.81	5238.95	7937.27	1218.34	9705.04	7182.08	8489.93	6008.99	5668.17	7929.5	908.632	2021.62	3101.37	1134.91	7501.15	2940.15	8815.03	8345.82	789.838	9584.45	4516.29	3908.18	10163.3	1125.71	7672.82	966.615	9070.06	9628.78	2196.98	573.464	11293.9	6928.94
10528.5	26	7720.19	573.464	8544.68	3652.91	10528.5	4529.73	4077.88	1464.42	1703.42	10112	8997.38	2583.06	1405.73	8037.58	8232.84	3288.05	3015.81	5238.95	7937.27	1218.34	9705.04	7182.08	8489.93	6008.99	5668.17	7929.5	908.632	2021.62	3101.37	1134.91	7501.15	2940.15	8815.03	8345.82	789.838	9584.45	4516.29	3908.18	10163.3	1125.71	7672.82	966.615	9070.06	9628.78	2196.98	573.464	6520.54	6928.94
10163.3	27	7720.19	573.464	8544.68	3652.91	9285.25	4529.73	4077.88	1464.42	1703.42	10112	8997.38	2583.06	1405.73	8037.58	8232.84	3288.05	3015.81	5238.95	7937.27	1218.34	9705.04	7182.08	8489.93	6008.99	5668.17	7929.5	908.632	2021.62	3101.37	1134.91	7501.15	2940.15	8815.03	8345.82	789.838	9584.45	4516.29	3908.18	10163.3	1125.71	7672.82	966.615	9070.06	9628.78	2196.98	573.464	6520.54	6928.94
10112	28	7720.19	573.464	8544.68	3652.91	9285.25	4529.73	4077.88	1464.42	1703.42	10112	8997.38	2583.06	1405.73	8037.58	8232.84	3288.05	3015.81	5238.95	7937.27	1218.34	9705.04	7182.08	8489.93	6008.99	5668.17	7929.5	908.632	2021.62	3101.37	1134.91	7501.15	2940.15	8815.03	8345.82	789.838	9584.45	4516.29	3908.18	7186.57	1125.71	7672.82	966.615	9070.06	9628.78	2196.98	573.464	6520.54	6928.94
9705.04	29	7720.19	573.464	8544.68	3652.91	9285.25	4529.73	4077.88	1464.42	1703.42	7832.72	8997.38	2583.06	1405.73	8037.58	8232.84	3288.05	3015.81	5238.95	7937.27	1218.34	9705.04	7182.08	8489.93	6008.99	5668.17	7929.5	908.632	2021.62	3101.37	1134.91	7501.15	2940.15	8815.03	8345.82	789.838	9584.45	4516.29	3908.18	7186.57	1125.71	7672.82	966.615	9070.06	9628.78	2196.98	573.464	6520.54	6928.94
9628.78	30	7720.19	573.464	8544.68	3652.91	9285.25	4529.73	4077.88	1464.42	1703.42	7832.72	8997.38	2583.06	1405.73	8037.58	8232.84	3288.05	3015.81	5238.95	7937.27	1218.34	5603.21	7182.08	8489.93	6008.99	5668.17	7929.5	908.632	2021.62	3101.37	1134.91	7501.15	2940.15	8815.03	8345.82	789.838	9584.45	4516.29	3908.18	7186.57	1125.71	7672.82	966.615	9070.06	9628.78	2196.98	573.464	6520.54	6928.94
9584.45	31	7720.19	573.464	8544.68	3652.91	9285.25	4529.73	4077.88	1464.42	1703.42	7832.72	8997.38	2583.06	1405.73	8037.58	8232.84	3288.05	3015.81	5238.95	7937.27	1218.34	5603.21	7182.08	8489.93	6008.99	5668.17	7929.5	908.632	2021.62	3101.37	1134.91	7501.15	2940.15	8815.03	8345.82	789.838	9584.45	4516.29	3908.18	7186.57	1125.71	7672.82	966.615	9070.06	8137.8	2196.98	573.464	6520.54	6928.94
9285.25	32	7720.19	573.464	8544.68	3652.91	9285.25	4529.73	4077.88	1464.42	1703.42	7832.72	8997.38	2583.06	1405.73	8037.58	8232.84	3288.05	3015.81	5238.95	7937.27	1218.34	5603.21	7182.08	8489.93	6008.99	5668.17	7929.5	908.632	2021.62	3101.37	1134.91	7501.15	2940.15	8815.03	8345.82	789.838	6777.23	4516.29	3908.18	7186.57	1125.71	7672.82	966.615	9070.06	8137.8	2196.98	573.464	6520.54	6928.94
9070.06	33	7720.19	573.464	8544.68	3652.91	8304.98	4529.73	4077.88	1464.42	1703.42	7832.72	8997.38	2583.06	1405.73	8037.58	8232.84	3288.05	3015.81	5238.95	7937.27	1218.34	5603.21	7182.08	8489.93	6008.99	5668.17	7929.5	908.632	2021.62	3101.37	1134.91	7501.15	2940.15	8815.03	8345.82	789.838	6777.23	4516.29	3908.18	7186.57	1125.71	7672.82	966.615	9070.06	8137.8	2196.98	573.464	6520.54	6928.94
8997.38	34	7720.19	573.464	8544.68	3652.91	8304.98	4529.73	4077.88	1464.42	1703.42	7832.72	8997.38	2583.06	1405.73	8037.58	8232.84	3288.05	3015.81	5238.95	7937.27	1218.34	5603.21	7182.08	8489.93	6008.99	5668.17	7929.5	908.632	2021.62	3101.37	1134.91	7501.15	2940.15	8815.03	8345.82	789.838	6777.23	4516.29	3908.18	7186.57	1125.71	7672.82	966.615	5236.6	8137.8	2196.98	573.464	6520.54	6928.94
8815.03	35	7720.19	573.464	8544.68	3652.91	8304.98	4529.73	4077.88	1464.42	1703.42	7832.72	6362.11	2583.06	1405.73	8037.58	8232.84	3288.05	3015.81	5238.95	7937.27	1218.34	5603.21	7182.08	8489.93	6008.99	5668.17	7929.5	908.632	2021.62	3101.37	1134.91	7501.15	2940.15	8815.03	8345.82	789.838	6777.23	4516.29	3908.18	7186.57	1125.71	7672.82	966.615	5236.6	8137.8	2196.98	573.464	6520.54	6928.94
8544.68	36	7720.19	573.464	8544.68	3652.91	8304.98	4529.73	4077.88	1464.42	1703.42	7832.72	6362.11	2583.06	1405.73	8037.58	8232.84	3288.05	3015.81	5238.95	7937.27	1218.34	5603.21	7182.08	8489.93	6008.99	5668.17	7929.5	908.632	2021.62	3101.37	1134.91	7501.15	2940.15	7197.44	8345.82	789.838	6777.23	4516.29	3908.18	7186.57	1125.71	7672.82	966.615	5236.6	8137.8	2196.98	573.464	6520.54	6928.94
8489.93	37	7720.19	573.464	4933.27	3652.91	8304.98	4529.73	4077.88	1464.42	1703.42	7832.72	6362.11	2583.06	1405.73	8037.58	8232.84	3288.05	3015.81	5238.95	7937.27	1218.34	5603.21	7182.08	8489.93	6008.99	5668.17	7929.5	908.632	2021.62	3101.37	1134.91	7501.15	2940.15	7197.44	8345.82	789.838	6777.23	4516.29	3908.18	7186.57	1125.71	7672.82	966.615	5236.6	8137.8	2196.98	573.464	6520.54	6928.94
8345.82	38	7720.19	573.464	4933.27	3652.91	8304.98	4529.73	4077.88	1464.42	1703.42	7832.72	6362.11	2583.06	1405.73	8037.58	8232.84	3288.05	3015.81	5238.95	7937.27	1218.34	5603.21	7182.08	6003.29	6008.99	5668.17	7929.5	908.632	2021.62	3101.37	1134.91	7501.15	2940.15	7197.44	8345.82	789.838	6777.23	4516.29	3908.18	7186.57	1125.71	7672.82	966.615	5236.6	8137.8	2196.98	573.464	6520.54	6928.94
8304.98	39	7720.19	573.464	4933.27	3652.91	8304.98	4529.73	4077.88	1464.42	1703.42	7832.72	6362.11	2583.06	1405.73	8037.58	8232.84	3288.05	3015.81	5238.95	7937.27	1218.34	5603.21	7182.08	6003.29	6008.99	5668.17	7929.5	908.632	2021.62	3101.37	1134.91	7501.15	2940.15	7197.44	5901.39	789.838	6777.23	4516.29	3908.18	7186.57	1125.71	7672.82	966.615	5236.6	8137.8	2196.98	573.464	6520.54	6928.94
8232.84	40	7720.19	573.464	4933.27	3652.91	7512.14	4529.73	4077.88	1464.42	1703.42	7832.72	6362.11	2583.06	1405.73	8037.58	8232.84	3288.05	3015.81	5238.95	7937.27	1218.34	5603.21	7182.08	6003.29	6008.99	5668.17	7929.5	908.632	2021.62	3101.37	1134.91	7501.15	2940.15	7197.44	5901.39	789.838	6777.23	4516.29	3908.18	7186.57	1125.71	7672.82	966.615	5236.6	8137.8	2196.98	573.464	6520.54	6928.94
8137.8	41	7720.19	573.464	4933.27	3652.91	7512.14	4529.73	4077.88	1464.42	1703.42	7832.72	6362.11	2583.06	1405.73	8037.58	4753.23	3288.05	3015.81	5238.95	7937.27	1218.34	5603.21	7182.08	6003.29	6008.99	5668.17	7929.5	908.632	2021.62	3101.37	1134.91	7501.15	2940.15	7197.44	5901.39	789.838	6777.23	4516.29	3908.18	7186.57	1125.71	7672.82	966.615	5236.6	8137.8	2196.98	573.464	6520.54	6928.94
8037.58	42	7720.19	573.464	4933.27	3652.91	7512.14	4529.73	4077.88	1464.42	1703.42	7832.72	6362.11	2583.06	1405.73	8037.58	4753.23	3288.05	3015.81	5238.95	7937.27	1218.34	5603.21	7182.08	6003.29	6008.99	5668.17	7929.5	908.632	2021.62	3101.37	1134.91	7501.15	2940.15	7197.44	5901.39	789.838	6777.23	4516.29	3908.18	7186.57	1125.71	7672.82	966.615	5236.6	7047.55	2196.98	573.464	6520.54	6928.94
7937.27	43	7720.19	573.464	4933.27	3652.91	7512.14	4529.73	4077.88	1464.42	1703.42	7832.72	6362.11	2583.06	1405.73	6225.88	4753.23	3288.05	3015.81	5238.95	7937.27	1218.34	5603.21	7182.08	6003.29	6008.99	5668.17	7929.5	908.632	2021.62	3101.37	1134.91	7501.15	2940.15	7197.44	5901.39	789.838	6777.23	4516.29	3908.18	7186.57	1125.71	7672.82	966.615	5236.6	7047.55	2196.98	573.464	6520.54	6928.94
7929.5	44	7720.19	573.464	4933.27	3652.91	7512.14	4529.73	4077.88	1464.42	1703.42	7832.72	6362.11	2583.06	1405.73	6225.88	4753.23	3288.05	3015.81	5238.95	4582.59	1218.34	5603.21	7182.08	6003.29	6008.99	5668.17	7929.5	908.632	2021.62	3101.37	1134.91	7501.15	2940.15	7197.44	5901.39	789.838	6777.23	4516.29	3908.18	7186.57	1125.71	7672.82	966.615	5236.6	7047.55	2196.98	573.464	6520.54	6928.94
7832.72	45	7720.19	573.464	4933.27	3652.91	7512.14	4529.73	4077.88	1464.42	1703.42	7832.72	6362.11	2583.06	1405.73	6225.88	4753.23	3288.05	3015.81	5238.95	4582.59	1218.34	5603.21	7182.08	6003.29	6008.99	5668.17	4578.1	908.632	2021.62	3101.37	1134.91	7501.15	2940.15	7197.44	5901.39	789.838	6777.23	4516.29	3908.18	7186.57	1125.71	7672.82	966.615	5236.6	7047.55	2196.98	573.464	6520.54	6928.94
7720.19	46	7720.19	573.464	4933.27	3652.91	7512.14	4529.73	4077.88	1464.42	1703.42	6395.39	6362.11	2583.06	1405.73	6225.88	4753.23	3288.05	3015.81	5238.95	4582.59	1218.34	5603.21	7182.08	6003.29	6008.99	5668.17	4578.1	908.632	2021.62	3101.37	1134.91	7501.15	2940.15	7197.44	5901.39	789.838	6777.23	4516.29	3908.18	7186.57	1125.71	7672.82	966.615	5236.6	7047.55	2196.98	573.464	6520.54	6928.94
7672.82	47	4457.25	573.464	4933.27	3652.91	7512.14	4529.73	4077.88	1464.42	1703.42	6395.39	6362.11	2583.06	1405.73	6225.88	4753.23	3288.05	3015.81	5238.95	4582.59	1218.34	5603.21	7182.08	6003.29	6008.99	5668.17	4578.1	908.632	2021.62	3101.37	1134.91	7501.15	2940.15	7197.44	5901.39	789.838	6777.23	4516.29	3908.18	7186.57	1125.71	7672.82	966.615	5236.6	7047.55	2196.98	573.464	6520.54	6928.94
7512.14	48	4457.25	573.464	4933.27	3652.91	7512.14	4529.73	4077.88	1464.42	1703.42	6395.39	6362.11	2583.06	1405.73	6225.88	4753.23	3288.05	3015.81	5238.95	4582.59	1218.34	5603.21	7182.08	6003.29	6008.99	5668.17	4578.1	908.632	2021.62	3101.37	1134.91	7501.15	2940.15	7197.44	5901.39	789.838	6777.23	4516.29	3908.18	7186.57	1125.71		966.615	5236.6	7047.55	2196.98	573.464	6520.54	6928.94
7501.15	49	4457.25	573.464	4933.27	3652.91	6857.62	4529.73	4077.88	1464.42	1703.42	6395.39	6362.11	2583.06	1405.73	6225.88	4753.23	3288.05	3015.81	5238.95	4582.59	1218.34	5603.21	7182.08	6003.29	6008.99	5668.17	4578.1	908.632	2021.62	3101.37	1134.91	7501.15	2940.15	7197.44	5901.39	789.838	6777.23	4516.29	3908.18	7186.57	1125.71		966.615	5236.6	7047.55	2196.98	573.464	6520.54	6928.94
7219.56	50	4457.25	573.464	4933.27	3652.91	6857.62	4529.73	4077.88	1464.42	1703.42	6395.39	6362.11	2583.06	1405.73	6225.88	4753.23	3288.05	3015.81	5238.95	4582.59	1218.34	5603.21	7182.08	6003.29	6008.99	5668.17	4578.1	908.632	2021.62	3101.37	1134.91	5304.12	2940.15	7197.44	5901.39	789.838	6777.23	4516.29	3908.18	7186.57	1125.71		966.615	5236.6	7047.55	2196.98	573.464	6520.54	6928.94
7197.44	51	4457.25	573.464	4933.27	3652.91	6857.62	4529.73	4077.88	1464.42	1703.42	6395.39	6362.11	2583.06	1405.73	6225.88	4753.23	3288.05	3015.81	5238.95	4582.59	1218.34	5603.21	7182.08	6003.29	6008.99	5668.17	4578.1	908.632	2021.62	3101.37	1134.91	5304.12	2940.15	7197.44	5901.39	789.838	6777.23	4516.29	3908.18	7186.57	1125.71		966.615	5236.6	7047.55	2196.98	573.464	6520.54	6928.94
7186.57	52	4457.25	573.464	4933.27	3652.91	6857.62	4529.73	4077.88	1464.42	1703.42	6395.39	6362.11	2583.06	1405.73	6225.88	4753.23	3288.05	3015.81	5238.95	4582.59	1218.34	5603.21	7182.08	6003.29	6008.99	5668.17	4578.1	908.632	2021.62	3101.37	1134.91	5304.12	2940.15	6082.95	5901.39	789.838	6777.23	4516.29	3908.18	7186.57	1125.71		966.615	5236.6	7047.55	2196.98	573.464	6520.54	6928.94
7182.08	53	4457.25	573.464	4933.27	3652.91	6857.62	4529.73	4077.88	1464.42	1703.42	6395.39	6362.11	2583.06	1405.73	6225.88	4753.23	3288.05	3015.81	5238.95	4582.59	1218.34	5603.21	7182.08	6003.29	6008.99	5668.17	4578.1	908.632	2021.62	3101.37	1134.91	5304.12	2940.15	6082.95	5901.39	789.838	6777.23	4516.29	3908.18	5566.69	1125.71		966.615	5236.6	7047.55	2196.98	573.464	6520.54	6928.94
7047.55	54	4457.25	573.464	4933.27	3652.91	6857.62	4529.73	4077.88	1464.42	1703.42	6395.39	6362.11	2583.06	1405.73	6225.88	4753.23	3288.05	3015.81	5238.95	4582.59	1218.34	5603.21	4146.58	6003.29	6008.99	5668.17	4578.1	908.632	2021.62	3101.37	1134.91	5304.12	2940.15	6082.95	5901.39	789.838	6777.23	4516.29	3908.18	5566.69	1125.71		966.615	5236.6	7047.55	2196.98	573.464	6520.54	6928.94
6928.94	55	4457.25	573.464	4933.27	3652.91	6857.62	4529.73	4077.88	1464.42	1703.42	6395.39	6362.11	2583.06	1405.73	6225.88	4753.23	3288.05	3015.81	5238.95	4582.59	1218.34	5603.21	4146.58	6003.29	6008.99	5668.17	4578.1	908.632	2021.62	3101.37	1134.91	5304.12	2940.15	6082.95	5901.39	789.838	6777.23	4516.29	3908.18	5566.69	1125.71		966.615	5236.6	6215.35	2196.98	573.464	6520.54	6928.94
6857.62	56	4457.25	573.464	4933.27	3652.91	6857.62	4529.73	4077.88	1464.42	1703.42	6395.39	6362.11	2583.06	1405.73	6225.88	4753.23	3288.05	3015.81	5238.95	4582.59	1218.34	5603.21	4146.58	6003.29	6008.99	5668.17	4578.1	908.632	2021.62	3101.37	1134.91	5304.12	2940.15	6082.95	5901.39	789.838	6777.23	4516.29	3908.18	5566.69	1125.71		966.615	5236.6	6215.35	2196.98	573.464	6520.54	4000.42
6777.23	57	4457.25	573.464	4933.27	3652.91	6308.09	4529.73	4077.88	1464.42	1703.42	6395.39	6362.11	2583.06	1405.73	6225.88	4753.23	3288.05	3015.81	5238.95	4582.59	1218.34	5603.21	4146.58	6003.29	6008.99	5668.17	4578.1	908.632	2021.62	3101.37	1134.91	5304.12	2940.15	6082.95	5901.39	789.838	6777.23	4516.29	3908.18	5566.69	1125.71		966.615	5236.6	6215.35	2196.98	573.464	6520.54	4000.42
6520.54	58	4457.25	573.464	4933.27	3652.91	6308.09	4529.73	4077.88	1464.42	1703.42	6395.39	6362.11	2583.06	1405.73	6225.88	4753.23	3288.05	3015.81	5238.95	4582.59	1218.34	5603.21	4146.58	6003.29	6008.99	5668.17	4578.1	908.632	2021.62	3101.37	1134.91	5304.12	2940.15	6082.95	5901.39	789.838	5249.62	4516.29	3908.18	5566.69	1125.71		966.615	5236.6	6215.35	2196.98	573.464	6520.54	4000.42
6395.39	59	4457.25	573.464	4933.27	3652.91	6308.09	4529.73	4077.88	1464.42	1703.42	6395.39	6362.11	2583.06	1405.73	6225.88	4753.23	3288.05	3015.81	5238.95	4582.59	1218.34	5603.21	4146.58	6003.29	6008.99	5668.17	4578.1	908.632	2021.62	3101.37	1134.91	5304.12	2940.15	6082.95	5901.39	789.838	5249.62	4516.29	3908.18	5566.69	1125.71		966.615	5236.6	6215.35	2196.98	573.464	4610.72	4000.42
6362.11	60	4457.25	573.464	4933.27	3652.91	6308.09	4529.73	4077.88	1464.42	1703.42	5405.09	6362.11	2583.06	1405.73	6225.88	4753.23	3288.05	3015.81	5238.95	4582.59	1218.34	5603.21	4146.58	6003.29	6008.99	5668.17	4578.1	908.632	2021.62	3101.37	1134.91	5304.12	2940.15	6082.95	5901.39	789.838	5249.62	4516.29	3908.18	5566.69	1125.71		966.615	5236.6	6215.35	2196.98	573.464	4610.72	4000.42
6308.09	61	4457.25	573.464	4933.27	3652.91	6308.09	4529.73	4077.88	1464.42	1703.42	5405.09	4928.07	2583.06	1405.73	6225.88	4753.23	3288.05	3015.81	5238.95	4582.59	1218.34	5603.21	4146.58	6003.29	6008.99	5668.17	4578.1	908.632	2021.62	3101.37	1134.91	5304.12	2940.15	6082.95	5901.39	789.838	5249.62	4516.29	3908.18	5566.69	1125.71		966.615	5236.6	6215.35	2196.98	573.464	4610.72	4000.42
6225.88	62	4457.25	573.464	4933.27	3652.91	5840.16	4529.73	4077.88	1464.42	1703.42	5405.09	4928.07	2583.06	1405.73	6225.88	4753.23	3288.05	3015.81	5238.95	4582.59	1218.34	5603.21	4146.58	6003.29	6008.99	5668.17	4578.1	908.632	2021.62	3101.37	1134.91	5304.12	2940.15	6082.95	5901.39	789.838	5249.62	4516.29	3908.18	5566.69	1125.71		966.615	5236.6	6215.35	2196.98	573.464	4610.72	4000.42
6215.35	63	4457.25	573.464	4933.27	3652.91	5840.16	4529.73	4077.88	1464.42	1703.42	5405.09	4928.07	2583.06	1405.73	5083.41	4753.23	3288.05	3015.81	5238.95	4582.59	1218.34	5603.21	4146.58	6003.29	6008.99	5668.17	4578.1	908.632	2021.62	3101.37	1134.91	5304.12	2940.15	6082.95	5901.39	789.838	5249.62	4516.29	3908.18	5566.69	1125.71		966.615	5236.6	6215.35	2196.98	573.464	4610.72	4000.42
6082.95	64	4457.25	573.464	4933.27	3652.91	5840.16	4529.73	4077.88	1464.42	1703.42	5405.09	4928.07	2583.06	1405.73	5083.41	4753.23	3288.05	3015.81	5238.95	4582.59	1218.34	5603.21	4146.58	6003.29	6008.99	5668.17	4578.1	908.632	2021.62	3101.37	1134.91	5304.12	2940.15	6082.95	5901.39	789.838	5249.62	4516.29	3908.18	5566.69	1125.71		966.615	5236.6	5559.18	2196.98	573.464	4610.72	4000.42
6008.99	65	4457.25	573.464	4933.27	3652.91	5840.16	4529.73	4077.88	1464.42	1703.42	5405.09	4928.07	2583.06	1405.73	5083.41	4753.23	3288.05	3015.81	5238.95	4582.59	1218.34	5603.21	4146.58	6003.29	6008.99	5668.17	4578.1	908.632	2021.62	3101.37	1134.91	5304.12	2940.15	5267.99	5901.39	789.838	5249.62	4516.29	3908.18	5566.69	1125.71		966.615	5236.6	5559.18	2196.98	573.464	4610.72	4000.42
6003.29	66	4457.25	573.464	4933.27	3652.91	5840.16	4529.73	4077.88	1464.42	1703.42	5405.09	4928.07	2583.06	1405.73	5083.41	4753.23	3288.05	3015.81	5238.95	4582.59	1218.34	5603.21	4146.58	6003.29	3469.29	5668.17	4578.1	908.632	2021.62	3101.37	1134.91	5304.12	2940.15	5267.99	5901.39	789.838	5249.62	4516.29	3908.18	5566.69	1125.71		966.615	5236.6	5559.18	2196.98	573.464	4610.72	4000.42
5901.39	67	4457.25	573.464	4933.27	3652.91	5840.16	4529.73	4077.88	1464.42	1703.42	5405.09	4928.07	2583.06	1405.73	5083.41	4753.23	3288.05	3015.81	5238.95	4582.59	1218.34	5603.21	4146.58	4650.13	3469.29	5668.17	4578.1	908.632	2021.62	3101.37	1134.91	5304.12	2940.15	5267.99	5901.39	789.838	5249.62	4516.29	3908.18	5566.69	1125.71		966.615	5236.6	5559.18	2196.98	573.464	4610.72	4000.42
5840.16	68	4457.25	573.464	4933.27	3652.91	5840.16	4529.73	4077.88	1464.42	1703.42	5405.09	4928.07	2583.06	1405.73	5083.41	4753.23	3288.05	3015.81	5238.95	4582.59	1218.34	5603.21	4146.58	4650.13	3469.29	5668.17	4578.1	908.632	2021.62	3101.37	1134.91	5304.12	2940.15	5267.99	4571.19	789.838	5249.62	4516.29	3908.18	5566.69	1125.71		966.615	5236.6	5559.18	2196.98	573.464	4610.72	4000.42
5668.17	69	4457.25	573.464	4933.27	3652.91	5436.89	4529.73	4077.88	1464.42	1703.42	5405.09	4928.07	2583.06	1405.73	5083.41	4753.23	3288.05	3015.81	5238.95	4582.59	1218.34	5603.21	4146.58	4650.13	3469.29	5668.17	4578.1	908.632	2021.62	3101.37	1134.91	5304.12	2940.15	5267.99	4571.19	789.838	5249.62	4516.29	3908.18	5566.69	1125.71		966.615	5236.6	5559.18	2196.98	573.464	4610.72	4000.42
5603.21	70	4457.25	573.464	4933.27	3652.91	5436.89	4529.73	4077.88	1464.42	1703.42	5405.09	4928.07	2583.06	1405.73	5083.41	4753.23	3288.05	3015.81	5238.95	4582.59	1218.34	5603.21	4146.58	4650.13	3469.29	3272.52	4578.1	908.632	2021.62	3101.37	1134.91	5304.12	2940.15	5267.99	4571.19	789.838	5249.62	4516.29	3908.18	5566.69	1125.71		966.615	5236.6	5559.18	2196.98	573.464	4610.72	4000.42
5566.69	71	4457.25	573.464	4933.27	3652.91	5436.89	4529.73	4077.88	1464.42	1703.42	5405.09	4928.07	2583.06	1405.73	5083.41	4753.23	3288.05	3015.81	5238.95	4582.59	1218.34	3962.07	4146.58	4650.13	3469.29	3272.52	4578.1	908.632	2021.62	3101.37	1134.91	5304.12	2940.15	5267.99	4571.19	789.838	5249.62	4516.29	3908.18	5566.69	1125.71		966.615	5236.6	5559.18	2196.98	573.464	4610.72	4000.42
5559.18	72	4457.25	573.464	4933.27	3652.91	5436.89	4529.73	4077.88	1464.42	1703.42	5405.09	4928.07	2583.06	1405.73	5083.41	4753.23	3288.05	3015.81	5238.95	4582.59	1218.34	3962.07	4146.58	4650.13	3469.29	3272.52	4578.1	908.632	2021.62	3101.37	1134.91	5304.12	2940.15	5267.99	4571.19	789.838	5249.62	4516.29	3908.18	4545.18	1125.71		966.615	5236.6	5559.18	2196.98	573.464	4610.72	4000.42
5436.89	73	4457.25	573.464	4933.27	3652.91	5436.89	4529.73	4077.88	1464.42	1703.42	5405.09	4928.07	2583.06	1405.73	5083.41	4753.23	3288.05	3015.81	5238.95	4582.59	1218.34	3962.07	4146.58	4650.13	3469.29	3272.52	4578.1	908.632	2021.62	3101.37	1134.91	5304.12	2940.15	5267.99	4571.19	789.838	5249.62	4516.29	3908.18	4545.18	1125.71		966.615	5236.6	5028.47	2196.98	573.464	4610.72	4000.42
5405.09	74	4457.25	573.464	4933.27	3652.91	5085.74	4529.73	4077.88	1464.42	1703.42	5405.09	4928.07	2583.06	1405.73	5083.41	4753.23	3288.05	3015.81	5238.95	4582.59	1218.34	3962.07	4146.58	4650.13	3469.29	3272.52	4578.1	908.632	2021.62	3101.37	1134.91	5304.12	2940.15	5267.99	4571.19	789.838	5249.62	4516.29	3908.18	4545.18	1125.71		966.615	5236.6	5028.47	2196.98	573.464	4610.72	4000.42
5304.12	75	4457.25	573.464	4933.27	3652.91	5085.74	4529.73	4077.88	1464.42	1703.42	4680.95	4928.07	2583.06	1405.73	5083.41	4753.23	3288.05	3015.81	5238.95	4582.59	1218.34	3962.07	4146.58	4650.13	3469.29	3272.52	4578.1	908.632	2021.62	3101.37	1134.91	5304.12	2940.15	5267.99	4571.19	789.838	5249.62	4516.29	3908.18	4545.18	1125.71		966.615	5236.6	5028.47	2196.98	573.464	4610.72	4000.42
5267.99	76	4457.25	573.464	4933.27	3652.91	5085.74	4529.73	4077.88	1464.42	1703.42	4680.95	4928.07	2583.06	1405.73	5083.41	4753.23	3288.05	3015.81	5238.95	4582.59	1218.34	3962.07	4146.58	4650.13	3469.29	3272.52	4578.1	908.632	2021.62	3101.37	1134.91	4108.55	2940.15	5267.99	4571.19	789.838	5249.62	4516.29	3908.18	4545.18	1125.71		966.615	5236.6	5028.47	2196.98	573.464	4610.72	4000.42
5249.62	77	4457.25	573.464	4933.27	3652.91	5085.74	4529.73	4077.88	1464.42	1703.42	4680.95	4928.07	2583.06	1405.73	5083.41	4753.23	3288.05	3015.81	5238.95	4582.59	1218.34	3962.07	4146.58	4650.13	3469.29	3272.52	4578.1	908.632	2021.62	3101.37	1134.91	4108.55	2940.15	4645.93	4571.19	789.838	5249.62	4516.29	3908.18	4545.18	1125.71		966.615	5236.6	5028.47	2196.98	573.464	4610.72	4000.42
5238.95	78	4457.25	573.464	4933.27	3652.91	5085.74	4529.73	4077.88	1464.42	1703.42	4680.95	4928.07	2583.06	1405.73	5083.41	4753.23	3288.05	3015.81	5238.95	4582.59	1218.34	3962.07	4146.58	4650.13	3469.29	3272.52	4578.1	908.632	2021.62	3101.37	1134.91	4108.55	2940.15	4645.93	4571.19	789.838	4286.29	4516.29	3908.18	4545.18	1125.71		966.615	5236.6	5028.47	2196.98	573.464	4610.72	4000.42
5236.6	79	4457.25	573.464	4933.27	3652.91	5085.74	4529.73	4077.88	1464.42	1703.42	4680.95	4928.07	2583.06	1405.73	5083.41	4753.23	3288.05	3015.81	3024.71	4582.59	1218.34	3962.07	4146.58	4650.13	3469.29	3272.52	4578.1	908.632	2021.62	3101.37	1134.91	4108.55	2940.15	4645.93	4571.19	789.838	4286.29	4516.29	3908.18	4545.18	1125.71		966.615	5236.6	5028.47	2196.98	573.464	4610.72	4000.42
5085.74	80	4457.25	573.464	4933.27	3652.91	5085.74	4529.73	4077.88	1464.42	1703.42	4680.95	4928.07	2583.06	1405.73	5083.41	4753.23	3288.05	3015.81	3024.71	4582.59	1218.34	3962.07	4146.58	4650.13	3469.29	3272.52	4578.1	908.632	2021.62	3101.37	1134.91	4108.55	2940.15	4645.93	4571.19	789.838	4286.29	4516.29	3908.18	4545.18	1125.71		966.615	3702.84	5028.47	2196.98	573.464	4610.72	4000.42
5083.41	81	4457.25	573.464	4933.27	3652.91	4777.22	4529.73	4077.88	1464.42	1703.42	4680.95	4928.07	2583.06	1405.73	5083.41	4753.23	3288.05	3015.81	3024.71	4582.59	1218.34	3962.07	4146.58	4650.13	3469.29	3272.52	4578.1	908.632	2021.62	3101.37	1134.91	4108.55	2940.15	4645.93	4571.19	789.838	4286.29	4516.29	3908.18	4545.18	1125.71		966.615	3702.84	5028.47	2196.98	573.464	4610.72	4000.42
5028.47	82	4457.25	573.464	4933.27	3652.91	4777.22	4529.73	4077.88	1464.42	1703.42	4680.95	4928.07	2583.06	1405.73	4296.27	4753.23	3288.05	3015.81	3024.71	4582.59	1218.34	3962.07	4146.58	4650.13	3469.29	3272.52	4578.1	908.632	2021.62	3101.37	1134.91	4108.55	2940.15	4645.93	4571.19	789.838	4286.29	4516.29	3908.18	4545.18	1125.71		966.615	3702.84	5028.47	2196.98	573.464	4610.72	4000.42
4933.27	83	4457.25	573.464	4933.27	3652.91	4777.22	4529.73	4077.88	1464.42	1703.42	4680.95	4928.07	2583.06	1405.73	4296.27	4753.23	3288.05	3015.81	3024.71	4582.59	1218.34	3962.07	4146.58	4650.13	3469.29	3272.52	4578.1	908.632	2021.62	3101.37	1134.91	4108.55	2940.15	4645.93	4571.19	789.838	4286.29	4516.29	3908.18	4545.18	1125.71		966.615	3702.84	4590.34	2196.98	573.464	4610.72	4000.42
4928.07	84	4457.25	573.464	3488.35	3652.91	4777.22	4529.73	4077.88	1464.42	1703.42	4680.95	4928.07	2583.06	1405.73	4296.27	4753.23	3288.05	3015.81	3024.71	4582.59	1218.34	3962.07	4146.58	4650.13	3469.29	3272.52	4578.1	908.632	2021.62	3101.37	1134.91	4108.55	2940.15	4645.93	4571.19	789.838	4286.29	4516.29	3908.18	4545.18	1125.71		966.615	3702.84	4590.34	2196.98	573.464	4610.72	4000.42
4777.22	85	4457.25	573.464	3488.35	3652.91	4777.22	4529.73	4077.88	1464.42	1703.42	4680.95	4023.75	2583.06	1405.73	4296.27	4753.23	3288.05	3015.81	3024.71	4582.59	1218.34	3962.07	4146.58	4650.13	3469.29	3272.52	4578.1	908.632	2021.62	3101.37	1134.91	4108.55	2940.15	4645.93	4571.19	789.838	4286.29	4516.29	3908.18	4545.18	1125.71		966.615	3702.84	4590.34	2196.98	573.464	4610.72	4000.42
4753.23	86	4457.25		3488.35	3652.91	4504.01	4529.73	4077.88	1464.42	1703.42	4680.95	4023.75			4296.27	4753.23	3288.05	3015.81	3024.71	4582.59	1218.34	3962.07	4146.58	4650.13	3469.29	3272.52	4578.1		2021.62		1134.91	4108.55	2940.15	4645.93	4571.19		4286.29	4516.29	3908.18	4545.18	1125.71			3702.84	4590.34	2196.98	573.464	4610.72	4000.42
4680.95	87	4457.25		3488.35	3652.91	4504.01	4529.73	4077.88	1464.42	1703.42	4680.95	4023.75			4296.27	3361.04	3288.05	3015.81	3024.71	4582.59	1218.34	3962.07	4146.58	4650.13	3469.29	3272.52	4578.1		2021.62		1134.91	4108.55	2940.15	4645.93	4571.19		4286.29	4516.29	3908.18	4545.18	1125.71			3702.84	4590.34	2196.98	573.464	4610.72	4000.42
4650.13	88	4457.25		3488.35	3652.91	4504.01	4529.73	4077.88	1464.42	1703.42	4128.21	4023.75			4296.27	3361.04	3288.05	3015.81	3024.71	4582.59	1218.34	3962.07	4146.58	4650.13	3469.29	3272.52	4578.1		2021.62		1134.91	4108.55	2940.15	4645.93	4571.19		4286.29	4516.29	3908.18	4545.18	1125.71			3702.84	4590.34	2196.98	573.464	4610.72	4000.42
4645.93	89	4457.25		3488.35	3652.91	4504.01	4529.73	4077.88	1464.42	1703.42	4128.21	4023.75			4296.27	3361.04	3288.05	3015.81	3024.71	4582.59	1218.34	3962.07	4146.58	3796.81	3469.29	3272.52	4578.1		2021.62		1134.91	4108.55	2940.15	4645.93	4571.19		4286.29	4516.29	3908.18	4545.18	1125.71			3702.84	4590.34	2196.98	573.464	4610.72	4000.42
4610.72	90	4457.25		3488.35	3652.91	4504.01	4529.73	4077.88	1464.42	1703.42	4128.21	4023.75			4296.27	3361.04	3288.05	3015.81	3024.71	4582.59	1218.34	3962.07	4146.58	3796.81	3469.29	3272.52	4578.1		2021.62		1134.91	4108.55	2940.15	4155.44	4571.19		4286.29	4516.29	3908.18	4545.18	1125.71			3702.84	4590.34	2196.98	573.464	4610.72	4000.42
4590.34	91	4457.25		3488.35	3652.91	4504.01	4529.73	4077.88	1464.42	1703.42	4128.21	4023.75			4296.27	3361.04	3288.05	3015.81	3024.71	4582.59	1218.34	3962.07	4146.58	3796.81	3469.29	3272.52	4578.1		2021.62		1134.91	4108.55	2940.15	4155.44	4571.19		4286.29	4516.29	3908.18	4545.18	1125.71			3702.84	4590.34	2196.98	573.464	3571.45	4000.42
4582.59	92	4457.25		3488.35	3652.91	4504.01	4529.73	4077.88	1464.42	1703.42	4128.21	4023.75			4296.27	3361.04	3288.05	3015.81	3024.71	4582.59	1218.34	3962.07	4146.58	3796.81	3469.29	3272.52	4578.1		2021.62		1134.91	4108.55	2940.15	4155.44	4571.19		4286.29	4516.29	3908.18	4545.18	1125.71			3702.84	4222.5	2196.98	573.464	3571.45	4000.42
4578.1	93	4457.25		3488.35	3652.91	4504.01	4529.73	4077.88	1464.42	1703.42	4128.21	4023.75			4296.27	3361.04	3288.05	3015.81	3024.71	3240.38	1218.34	3962.07	4146.58	3796.81	3469.29	3272.52	4578.1		2021.62		1134.91	4108.55	2940.15	4155.44	4571.19		4286.29	4516.29	3908.18	4545.18	1125.71			3702.84	4222.5	2196.98	573.464	3571.45	4000.42
4571.19	94	4457.25		3488.35	3652.91	4504.01	4529.73	4077.88	1464.42	1703.42	4128.21	4023.75			4296.27	3361.04	3288.05	3015.81	3024.71	3240.38	1218.34	3962.07	4146.58	3796.81	3469.29	3272.52	3237.2		2021.62		1134.91	4108.55	2940.15	4155.44	4571.19		4286.29	4516.29	3908.18	4545.18	1125.71			3702.84	4222.5	2196.98	573.464	3571.45	4000.42
4545.18	95	4457.25		3488.35	3652.91	4504.01	4529.73	4077.88	1464.42	1703.42	4128.21	4023.75			4296.27	3361.04	3288.05	3015.81	3024.71	3240.38	1218.34	3962.07	4146.58	3796.81	3469.29	3272.52	3237.2		2021.62		1134.91	4108.55	2940.15	4155.44	3732.36		4286.29	4516.29	3908.18	4545.18	1125.71			3702.84	4222.5	2196.98	573.464	3571.45	4000.42
4529.73	96	4457.25		3488.35	3652.91	4504.01	4529.73	4077.88	1464.42	1703.42	4128.21	4023.75			4296.27	3361.04	3288.05	3015.81	3024.71	3240.38	1218.34	3962.07	4146.58	3796.81	3469.29	3272.52	3237.2		2021.62		1134.91	4108.55	2940.15	4155.44	3732.36		4286.29	4516.29	3908.18	3841.38	1125.71			3702.84	4222.5	2196.98	573.464	3571.45	4000.42
4516.29	97	4457.25		3488.35	3652.91	4504.01	2615.24	4077.88	1464.42	1703.42	4128.21	4023.75			4296.27	3361.04	3288.05	3015.81	3024.71	3240.38	1218.34	3962.07	4146.58	3796.81	3469.29	3272.52	3237.2		2021.62		1134.91	4108.55	2940.15	4155.44	3732.36		4286.29	4516.29	3908.18	3841.38	1125.71			3702.84	4222.5	2196.98	573.464	3571.45	4000.42
4504.01	98	4457.25		3488.35	3652.91	4504.01	2615.24	4077.88	1464.42	1703.42	4128.21	4023.75			4296.27	3361.04	3288.05	3015.81	3024.71	3240.38	1218.34	3962.07	4146.58	3796.81	3469.29	3272.52	3237.2		2021.62		1134.91	4108.55	2940.15	4155.44	3732.36		4286.29	2607.48	3908.18	3841.38	1125.71			3702.84	4222.5	2196.98	573.464	3571.45	4000.42
4457.25	99	4457.25		3488.35	3652.91	4260.37	2615.24	4077.88	1464.42	1703.42	4128.21	4023.75			4296.27	3361.04	3288.05	3015.81	3024.71	3240.38	1218.34	3962.07	4146.58	3796.81	3469.29	3272.52	3237.2		2021.62		1134.91	4108.55	2940.15	4155.44	3732.36		4286.29	2607.48	3908.18	3841.38	1125.71			3702.84	4222.5	2196.98	573.464	3571.45	4000.42
4296.27	100	3151.76		3488.35	3652.91	4260.37	2615.24	4077.88	1464.42	1703.42	4128.21	4023.75			4296.27	3361.04	3288.05	3015.81	3024.71	3240.38	1218.34	3962.07	4146.58	3796.81	3469.29	3272.52	3237.2		2021.62		1134.91	4108.55	2940.15	4155.44	3732.36		4286.29	2607.48	3908.18	3841.38	1125.71			3702.84	4222.5	2196.98	573.464	3571.45	4000.42
4286.29	101	3151.76		3488.35	3652.91	4260.37	2615.24	4077.88	1464.42	1703.42	4128.21	4023.75			3720.68	3361.04	3288.05	3015.81	3024.71	3240.38	1218.34	3962.07	4146.58	3796.81	3469.29	3272.52	3237.2		2021.62		1134.91	4108.55	2940.15	4155.44	3732.36		4286.29	2607.48	3908.18	3841.38	1125.71			3702.84	4222.5	2196.98	573.464	3571.45	4000.42
4260.37	102	3151.76		3488.35	3652.91	4260.37	2615.24	4077.88	1464.42	1703.42	4128.21	4023.75			3720.68	3361.04	3288.05	3015.81	3024.71	3240.38	1218.34	3962.07	4146.58	3796.81	3469.29	3272.52	3237.2		2021.62		1134.91	4108.55	2940.15	4155.44	3732.36		3622.58	2607.48	3908.18	3841.38	1125.71			3702.84	4222.5	2196.98	573.464	3571.45	4000.42
4222.5	103	3151.76		3488.35	3652.91	4041.74	2615.24	4077.88	1464.42	1703.42	4128.21	4023.75			3720.68	3361.04	3288.05	3015.81	3024.71	3240.38	1218.34	3962.07	4146.58	3796.81	3469.29	3272.52	3237.2		2021.62		1134.91	4108.55	2940.15	4155.44	3732.36		3622.58	2607.48	3908.18	3841.38	1125.71			3702.84	4222.5	2196.98	573.464	3571.45	4000.42
4168.22	104	3151.76		3488.35	3652.91	4041.74	2615.24	4077.88	1464.42	1703.42	4128.21	4023.75			3720.68	3361.04	3288.05	3015.81	3024.71	3240.38	1218.34	3962.07	4146.58	3796.81	3469.29	3272.52	3237.2		2021.62		1134.91	4108.55	2940.15	4155.44	3732.36		3622.58	2607.48	3908.18	3841.38	1125.71			3702.84	3909.27	2196.98	573.464	3571.45	4000.42
4155.44	105	3151.76		3488.35	3652.91	4041.74	2615.24	4077.88	1464.42	1703.42	4128.21	4023.75			3720.68	3361.04	3288.05	3015.81	3024.71	3240.38	1218.34	3962.07	4146.58	3796.81	3469.29	3272.52	3237.2		2021.62		1134.91	4108.55	2940.15	4155.44	3732.36		3622.58	2607.48	3908.18	3841.38	1125.71			3702.84	3909.27	2196.98	573.464	3571.45	4000.42
4146.58	106	3151.76		3488.35	3652.91	4041.74	2615.24	4077.88	1464.42	1703.42	4128.21	4023.75			3720.68	3361.04	3288.05	3015.81	3024.71	3240.38	1218.34	3962.07	4146.58	3796.81	3469.29	3272.52	3237.2		2021.62		1134.91	4108.55	2940.15	3758.74	3732.36		3622.58	2607.48	3908.18	3841.38	1125.71			3702.84	3909.27	2196.98	573.464	3571.45	4000.42
4128.21	107	3151.76		3488.35	3652.91	4041.74	2615.24	4077.88	1464.42	1703.42	4128.21	4023.75			3720.68	3361.04	3288.05	3015.81	3024.71	3240.38	1218.34	3962.07	2932.07	3796.81	3469.29	3272.52	3237.2		2021.62		1134.91	4108.55	2940.15	3758.74	3732.36		3622.58	2607.48	3908.18	3841.38	1125.71			3702.84	3909.27	2196.98	573.464	3571.45	4000.42
4108.55	108	3151.76		3488.35	3652.91	4041.74	2615.24	4077.88	1464.42	1703.42	3692.38	4023.75			3720.68	3361.04	3288.05	3015.81	3024.71	3240.38	1218.34	3962.07	2932.07	3796.81	3469.29	3272.52	3237.2		2021.62		1134.91	4108.55	2940.15	3758.74	3732.36		3622.58	2607.48	3908.18	3841.38	1125.71			3702.84	3909.27	2196.98	573.464	3571.45	4000.42
4077.88	109	3151.76		3488.35	3652.91	4041.74	2615.24	4077.88	1464.42	1703.42	3692.38	4023.75			3720.68	3361.04	3288.05	3015.81	3024.71	3240.38	1218.34	3962.07	2932.07	3796.81	3469.29	3272.52	3237.2		2021.62		1134.91	3354.62	2940.15	3758.74	3732.36		3622.58	2607.48	3908.18	3841.38	1125.71			3702.84	3909.27	2196.98	573.464	3571.45	4000.42
4041.74	110	3151.76		3488.35	3652.91	4041.74	2615.24	2354.37	1464.42	1703.42	3692.38	4023.75			3720.68	3361.04	3288.05	3015.81	3024.71	3240.38	1218.34	3962.07	2932.07	3796.81	3469.29	3272.52	3237.2		2021.62		1134.91	3354.62	2940.15	3758.74	3732.36		3622.58	2607.48	3908.18	3841.38	1125.71			3702.84	3909.27	2196.98	573.464	3571.45	4000.42
4023.75	111	3151.76		3488.35	3652.91	3844.46	2615.24	2354.37	1464.42	1703.42	3692.38	4023.75			3720.68	3361.04	3288.05	3015.81	3024.71	3240.38	1218.34	3962.07	2932.07	3796.81	3469.29	3272.52	3237.2		2021.62		1134.91	3354.62	2940.15	3758.74	3732.36		3622.58	2607.48	3908.18	3841.38	1125.71			3702.84	3909.27	2196.98	573.464	3571.45	4000.42
4000.42	112	3151.76		3488.35	3652.91	3844.46	2615.24	2354.37	1464.42	1703.42	3692.38	3400.69			3720.68	3361.04	3288.05	3015.81	3024.71	3240.38	1218.34	3962.07	2932.07	3796.81	3469.29	3272.52	3237.2		2021.62		1134.91	3354.62	2940.15	3758.74	3732.36		3622.58	2607.48	3908.18	3841.38	1125.71			3702.84	3909.27	2196.98	573.464	3571.45	4000.42
3962.07	113	3151.76		3488.35	3652.91	3844.46	2615.24	2354.37	1464.42	1703.42	3692.38	3400.69			3720.68	3361.04	3288.05	3015.81	3024.71	3240.38	1218.34	3962.07	2932.07	3796.81	3469.29	3272.52	3237.2		2021.62		1134.91	3354.62	2940.15	3758.74	3732.36		3622.58	2607.48	3908.18	3841.38	1125.71			3702.84	3909.27	2196.98	573.464	3571.45	2828.73
3909.27	114	3151.76		3488.35	3652.91	3844.46	2615.24	2354.37	1464.42	1703.42	3692.38	3400.69			3720.68	3361.04	3288.05	3015.81	3024.71	3240.38	1218.34	3069	2932.07	3796.81	3469.29	3272.52	3237.2		2021.62		1134.91	3354.62	2940.15	3758.74	3732.36		3622.58	2607.48	3908.18	3841.38	1125.71			3702.84	3909.27	2196.98	573.464	3571.45	2828.73
3908.18	115	3151.76		3488.35	3652.91	3844.46	2615.24	2354.37	1464.42	1703.42	3692.38	3400.69			3720.68	3361.04	3288.05	3015.81	3024.71	3240.38	1218.34	3069	2932.07	3796.81	3469.29	3272.52	3237.2		2021.62		1134.91	3354.62	2940.15	3758.74	3732.36		3622.58	2607.48	3908.18	3841.38	1125.71			3702.84	3639.34	2196.98	573.464	3571.45	2828.73
3844.46	116	3151.76		3488.35	3652.91	3844.46	2615.24	2354.37	1464.42	1703.42	3692.38	3400.69			3720.68	3361.04	3288.05	3015.81	3024.71	3240.38	1218.34	3069	2932.07	3796.81	3469.29	3272.52	3237.2		2021.62		1134.91	3354.62	2940.15	3758.74	3732.36		3622.58	2607.48	2256.39	3841.38	1125.71			3702.84	3639.34	2196.98	573.464	3571.45	2828.73
3841.38	117	3151.76		3488.35	3652.91	3665.55	2615.24	2354.37	1464.42	1703.42	3692.38	3400.69			3720.68	3361.04	3288.05	3015.81	3024.71	3240.38	1218.34	3069	2932.07	3796.81	3469.29	3272.52	3237.2		2021.62		1134.91	3354.62	2940.15	3758.74	3732.36		3622.58	2607.48	2256.39	3841.38	1125.71			3702.84	3639.34	2196.98	573.464	3571.45	2828.73
3796.81	118	3151.76		3488.35	3652.91	3665.55	2615.24	2354.37	1464.42	1703.42	3692.38	3400.69			3720.68	3361.04	3288.05	3015.81	3024.71	3240.38	1218.34	3069	2932.07	3796.81	3469.29	3272.52	3237.2		2021.62		1134.91	3354.62	2940.15	3758.74	3732.36		3622.58	2607.48	2256.39	3326.73	1125.71			3702.84	3639.34	2196.98	573.464	3571.45	2828.73
3758.74	119	3151.76		3488.35	3652.91	3665.55	2615.24	2354.37	1464.42	1703.42	3692.38	3400.69			3720.68	3361.04	3288.05	3015.81	3024.71	3240.38	1218.34	3069	2932.07	3208.89	3469.29	3272.52	3237.2		2021.62		1134.91	3354.62	2940.15	3758.74	3732.36		3622.58	2607.48	2256.39	3326.73	1125.71			3702.84	3639.34	2196.98	573.464	3571.45	2828.73
3732.36	120	3151.76		3488.35	3652.91	3665.55	2615.24	2354.37	1464.42	1703.42	3692.38	3400.69			3720.68	3361.04	3288.05	3015.81	3024.71	3240.38	1218.34	3069	2932.07	3208.89	3469.29	3272.52	3237.2		2021.62		1134.91	3354.62	2940.15	3431.24	3732.36		3622.58	2607.48	2256.39	3326.73	1125.71			3702.84	3639.34	2196.98	573.464	3571.45	2828.73
3720.68	121	3151.76		3488.35	3652.91	3665.55	2615.24	2354.37	1464.42	1703.42	3692.38	3400.69			3720.68	3361.04	3288.05	3015.81	3024.71	3240.38	1218.34	3069	2932.07	3208.89	3469.29	3272.52	3237.2		2021.62		1134.91	3354.62	2940.15	3431.24	3154.42		3622.58	2607.48	2256.39	3326.73	1125.71			3702.84	3639.34	2196.98	573.464	3571.45	2828.73
3702.84	122	3151.76		3488.35	3652.91	3665.55	2615.24	2354.37	1464.42	1703.42	3692.38	3400.69			3281.33	3361.04	3288.05	3015.81	3024.71	3240.38	1218.34	3069	2932.07	3208.89	3469.29	3272.52	3237.2		2021.62		1134.91	3354.62	2940.15	3431.24	3154.42		3622.58	2607.48	2256.39	3326.73	1125.71			3702.84	3639.34	2196.98	573.464	3571.45	2828.73
3692.38	123	3151.76		3488.35	3652.91	3665.55	2615.24	2354.37	1464.42	1703.42	3692.38	3400.69			3281.33	3361.04	3288.05	3015.81	3024.71	3240.38	1218.34	3069	2932.07	3208.89	3469.29	3272.52	3237.2		2021.62		1134.91	3354.62	2940.15	3431.24	3154.42		3622.58	2607.48	2256.39	3326.73	1125.71			2868.2	3639.34	2196.98	573.464	3571.45	2828.73
3665.55	124	3151.76		3488.35	3652.91	3665.55	2615.24	2354.37	1464.42	1703.42	3339.88	3400.69			3281.33	3361.04	3288.05	3015.81	3024.71	3240.38	1218.34	3069	2932.07	3208.89	3469.29	3272.52	3237.2		2021.62		1134.91	3354.62	2940.15	3431.24	3154.42		3622.58	2607.48	2256.39	3326.73	1125.71			2868.2	3639.34	2196.98	573.464	3571.45	2828.73
3652.91	125	3151.76		3488.35	3652.91	3502.55	2615.24	2354.37	1464.42	1703.42	3339.88	3400.69			3281.33	3361.04	3288.05	3015.81	3024.71	3240.38	1218.34	3069	2932.07	3208.89	3469.29	3272.52	3237.2		2021.62		1134.91	3354.62	2940.15	3431.24	3154.42		3622.58	2607.48	2256.39	3326.73	1125.71			2868.2	3639.34	2196.98	573.464	3571.45	2828.73
3639.34	126	3151.76		3488.35	2109.01	3502.55	2615.24	2354.37	1464.42	1703.42	3339.88	3400.69			3281.33	3361.04	3288.05	3015.81	3024.71	3240.38	1218.34	3069	2932.07	3208.89	3469.29	3272.52	3237.2		2021.62		1134.91	3354.62	2940.15	3431.24	3154.42		3622.58	2607.48	2256.39	3326.73	1125.71			2868.2	3639.34	2196.98	573.464	3571.45	2828.73
3622.58	127	3151.76		3488.35	2109.01	3502.55	2615.24	2354.37	1464.42	1703.42	3339.88	3400.69			3281.33	3361.04	3288.05	3015.81	3024.71	3240.38	1218.34	3069	2932.07	3208.89	3469.29	3272.52	3237.2		2021.62		1134.91	3354.62	2940.15	3431.24	3154.42		3622.58	2607.48	2256.39	3326.73	1125.71			2868.2	3404.29	2196.98	573.464	3571.45	2828.73
3571.45	128	3151.76		3488.35	2109.01	3502.55	2615.24	2354.37	1464.42	1703.42	3339.88	3400.69			3281.33	3361.04	3288.05	3015.81	3024.71	3240.38	1218.34	3069	2932.07	3208.89	3469.29	3272.52	3237.2		2021.62		1134.91	3354.62	2940.15	3431.24	3154.42		3137.25	2607.48	2256.39	3326.73	1125.71			2868.2	3404.29	2196.98	573.464	3571.45	2828.73
3502.55	129	3151.76		3488.35	2109.01	3502.55	2615.24	2354.37	1464.42	1703.42	3339.88	3400.69			3281.33	3361.04	3288.05	3015.81	3024.71	3240.38	1218.34	3069	2932.07	3208.89	3469.29	3272.52	3237.2		2021.62		1134.91	3354.62	2940.15	3431.24	3154.42		3137.25	2607.48	2256.39	3326.73	1125.71			2868.2	3404.29	2196.98	573.464	2916.07	2828.73
3488.35	130	3151.76		3488.35	2109.01	3353.44	2615.24	2354.37	1464.42	1703.42	3339.88	3400.69			3281.33	3361.04	3288.05	3015.81	3024.71	3240.38	1218.34	3069	2932.07	3208.89	3469.29	3272.52	3237.2		2021.62		1134.91	3354.62	2940.15	3431.24	3154.42		3137.25	2607.48	2256.39	3326.73	1125.71			2868.2	3404.29	2196.98	573.464	2916.07	2828.73
3469.29	131	3151.76			2109.01	3353.44	2615.24	2354.37	1464.42	1703.42	3339.88	3400.69			3281.33	3361.04	3288.05	3015.81	3024.71	3240.38	1218.34	3069	2932.07	3208.89	3469.29	3272.52	3237.2		2021.62		1134.91	3354.62	2940.15	3431.24	3154.42		3137.25	2607.48	2256.39	3326.73	1125.71			2868.2	3404.29	2196.98	573.464	2916.07	2828.73
3431.24	132	3151.76			2109.01	3353.44	2615.24	2354.37	1464.42	1703.42	3339.88	3400.69			3281.33	3361.04	3288.05	3015.81	3024.71	3240.38	1218.34	3069	2932.07	3208.89	2453.16	3272.52	3237.2		2021.62		1134.91	3354.62	2940.15	3431.24	3154.42		3137.25	2607.48	2256.39	3326.73	1125.71			2868.2	3404.29	2196.98	573.464	2916.07	2828.73
3404.29	133	3151.76			2109.01	3353.44	2615.24	2354.37	1464.42	1703.42	3339.88	3400.69			3281.33	3361.04	3288.05	3015.81	3024.71	3240.38	1218.34	3069	2932.07	3208.89	2453.16	3272.52	3237.2		2021.62		1134.91	3354.62	2940.15	3156.29	3154.42		3137.25	2607.48	2256.39	3326.73	1125.71			2868.2	3404.29	2196.98	573.464	2916.07	2828.73
3400.69	134	3151.76			2109.01	3353.44	2615.24	2354.37	1464.42	1703.42	3339.88	3400.69			3281.33	3361.04	3288.05	3015.81	3024.71	3240.38	1218.34	3069	2932.07	3208.89	2453.16	3272.52	3237.2		2021.62		1134.91	3354.62	2940.15	3156.29	3154.42		3137.25	2607.48	2256.39	3326.73	1125.71			2868.2	3197.77	2196.98	573.464	2916.07	2828.73
3361.04	135	3151.76			2109.01	3353.44	2615.24	2354.37	1464.42	1703.42	3339.88	2945.09			3281.33	3361.04	3288.05	3015.81	3024.71	3240.38	1218.34	3069	2932.07	3208.89	2453.16	3272.52	3237.2		2021.62		1134.91	3354.62	2940.15	3156.29	3154.42		3137.25	2607.48	2256.39	3326.73	1125.71			2868.2	3197.77	2196.98	573.464	2916.07	2828.73
3354.62	136	3151.76			2109.01	3353.44	2615.24	2354.37	1464.42	1703.42	3339.88	2945.09			3281.33		3288.05	3015.81	3024.71	3240.38	1218.34	3069	2932.07	3208.89	2453.16	3272.52	3237.2		2021.62		1134.91	3354.62	2940.15	3156.29	3154.42		3137.25	2607.48	2256.39	3326.73	1125.71			2868.2	3197.77	2196.98	573.464	2916.07	2828.73
3353.44	137	3151.76			2109.01	3353.44	2615.24	2354.37	1464.42	1703.42	3339.88	2945.09			3281.33		3288.05	3015.81	3024.71	3240.38	1218.34	3069	2932.07	3208.89	2453.16	3272.52	3237.2		2021.62		1134.91	2835.17	2940.15	3156.29	3154.42		3137.25	2607.48	2256.39	3326.73	1125.71			2868.2	3197.77	2196.98	573.464	2916.07	2828.73
3339.88	138	3151.76			2109.01	3216.51	2615.24	2354.37	1464.42	1703.42	3339.88	2945.09			3281.33		3288.05	3015.81	3024.71	3240.38	1218.34	3069	2932.07	3208.89	2453.16	3272.52	3237.2		2021.62		1134.91	2835.17	2940.15	3156.29	3154.42		3137.25	2607.48	2256.39	3326.73	1125.71			2868.2	3197.77	2196.98	573.464	2916.07	2828.73
3326.73	139	3151.76			2109.01	3216.51	2615.24	2354.37	1464.42	1703.42	3048.88	2945.09			3281.33		3288.05	3015.81	3024.71	3240.38	1218.34	3069	2932.07	3208.89	2453.16	3272.52	3237.2		2021.62		1134.91	2835.17	2940.15	3156.29	3154.42		3137.25	2607.48	2256.39	3326.73	1125.71			2868.2	3197.77	2196.98	573.464	2916.07	2828.73
3288.05	140	3151.76			2109.01	3216.51	2615.24	2354.37	1464.42	1703.42	3048.88	2945.09			3281.33		3288.05	3015.81	3024.71	3240.38	1218.34	3069	2932.07	3208.89	2453.16	3272.52	3237.2		2021.62		1134.91	2835.17	2940.15	3156.29	3154.42		3137.25	2607.48	2256.39	2933.9	1125.71			2868.2	3197.77	2196.98	573.464	2916.07	2828.73
3281.33	141	3151.76			2109.01	3216.51	2615.24	2354.37	1464.42	1703.42	3048.88	2945.09			3281.33		1898.35	3015.81	3024.71	3240.38	1218.34	3069	2932.07	3208.89	2453.16	3272.52	3237.2		2021.62		1134.91	2835.17	2940.15	3156.29	3154.42		3137.25	2607.48	2256.39	2933.9	1125.71			2868.2	3197.77	2196.98	573.464	2916.07	2828.73
3272.52	142	3151.76			2109.01	3216.51	2615.24	2354.37	1464.42	1703.42	3048.88	2945.09			2934.91		1898.35	3015.81	3024.71	3240.38	1218.34	3069	2932.07	3208.89	2453.16	3272.52	3237.2		2021.62		1134.91	2835.17	2940.15	3156.29	3154.42		3137.25	2607.48	2256.39	2933.9	1125.71			2868.2	3197.77	2196.98	573.464	2916.07	2828.73
3240.38	143	3151.76			2109.01	3216.51	2615.24	2354.37	1464.42	1703.42	3048.88	2945.09			2934.91		1898.35	3015.81	3024.71	3240.38	1218.34	3069	2932.07	3208.89	2453.16	2314.02	3237.2		2021.62		1134.91	2835.17	2940.15	3156.29	3154.42		3137.25	2607.48	2256.39	2933.9	1125.71			2868.2	3197.77	2196.98	573.464	2916.07	2828.73
3237.2	144	3151.76			2109.01	3216.51	2615.24	2354.37	1464.42	1703.42	3048.88	2945.09			2934.91		1898.35	3015.81	3024.71	2509.99	1218.34	3069	2932.07	3208.89	2453.16	2314.02	3237.2		2021.62		1134.91	2835.17	2940.15	3156.29	3154.42		3137.25	2607.48	2256.39	2933.9	1125.71			2868.2	3197.77	2196.98	573.464	2916.07	2828.73
3216.51	145	3151.76			2109.01	3216.51	2615.24	2354.37	1464.42	1703.42	3048.88	2945.09			2934.91		1898.35	3015.81	3024.71	2509.99	1218.34	3069	2932.07	3208.89	2453.16	2314.02	2507.53		2021.62		1134.91	2835.17	2940.15	3156.29	3154.42		3137.25	2607.48	2256.39	2933.9	1125.71			2868.2	3197.77	2196.98	573.464	2916.07	2828.73
3208.89	146	3151.76			2109.01	3090.32	2615.24	2354.37	1464.42	1703.42	3048.88	2945.09			2934.91		1898.35	3015.81	3024.71	2509.99	1218.34	3069	2932.07	3208.89	2453.16	2314.02	2507.53		2021.62		1134.91	2835.17	2940.15	3156.29	3154.42		3137.25	2607.48	2256.39	2933.9	1125.71			2868.2	3197.77	2196.98	573.464	2916.07	2828.73
3197.77	147	3151.76			2109.01	3090.32	2615.24	2354.37	1464.42	1703.42	3048.88	2945.09			2934.91		1898.35	3015.81	3024.71	2509.99	1218.34	3069	2932.07	2778.98	2453.16	2314.02	2507.53		2021.62		1134.91	2835.17	2940.15	3156.29	3154.42		3137.25	2607.48	2256.39	2933.9	1125.71			2868.2	3197.77	2196.98	573.464	2916.07	2828.73
3156.29	148	3151.76			2109.01	3090.32	2615.24	2354.37	1464.42	1703.42	3048.88	2945.09			2934.91		1898.35	3015.81	3024.71	2509.99	1218.34	3069	2932.07	2778.98	2453.16	2314.02	2507.53		2021.62		1134.91	2835.17	2940.15	3156.29	3154.42		3137.25	2607.48	2256.39	2933.9	1125.71			2868.2	3014.89	2196.98	573.464	2916.07	2828.73
3154.42	149	3151.76			2109.01	3090.32	2615.24	2354.37	1464.42	1703.42	3048.88	2945.09			2934.91		1898.35	3015.81	3024.71	2509.99	1218.34	3069	2932.07	2778.98	2453.16	2314.02	2507.53		2021.62		1134.91	2835.17	2940.15	2922.15	3154.42		3137.25	2607.48	2256.39	2933.9	1125.71			2868.2	3014.89	2196.98	573.464	2916.07	2828.73
3151.76	150	3151.76			2109.01	3090.32	2615.24	2354.37	1464.42	1703.42	3048.88	2945.09			2934.91		1898.35	3015.81	3024.71	2509.99	1218.34	3069	2932.07	2778.98	2453.16	2314.02	2507.53		2021.62		1134.91	2835.17	2940.15	2922.15	2731.81		3137.25	2607.48	2256.39	2933.9	1125.71			2868.2	3014.89	2196.98	573.464	2916.07	2828.73
3137.25	151	2441.34			2109.01	3090.32	2615.24	2354.37	1464.42	1703.42	3048.88	2945.09			2934.91		1898.35	3015.81	3024.71	2509.99	1218.34	3069	2932.07	2778.98	2453.16	2314.02	2507.53		2021.62		1134.91	2835.17	2940.15	2922.15	2731.81		3137.25	2607.48	2256.39	2933.9	1125.71			2868.2	3014.89	2196.98	573.464	2916.07	2828.73
3090.32	152	2441.34			2109.01	3090.32	2615.24	2354.37	1464.42	1703.42	3048.88	2945.09			2934.91		1898.35	3015.81	3024.71	2509.99	1218.34	3069	2932.07	2778.98	2453.16	2314.02	2507.53		2021.62		1134.91	2835.17	2940.15	2922.15	2731.81		2766.79	2607.48	2256.39	2933.9	1125.71			2868.2	3014.89	2196.98	573.464	2916.07	2828.73
3069	153	2441.34			2109.01	2973.66	2615.24	2354.37	1464.42	1703.42	3048.88	2945.09			2934.91		1898.35	3015.81	3024.71	2509.99	1218.34	3069	2932.07	2778.98	2453.16	2314.02	2507.53		2021.62		1134.91	2835.17	2940.15	2922.15	2731.81		2766.79	2607.48	2256.39	2933.9	1125.71			2868.2	3014.89	2196.98	573.464	2916.07	2828.73
3048.88	154	2441.34			2109.01	2973.66	2615.24	2354.37	1464.42	1703.42	3048.88	2945.09			2934.91		1898.35	3015.81	3024.71	2509.99	1218.34	2505.83	2932.07	2778.98	2453.16	2314.02	2507.53		2021.62		1134.91	2835.17	2940.15	2922.15	2731.81		2766.79	2607.48	2256.39	2933.9	1125.71			2868.2	3014.89	2196.98	573.464	2916.07	2828.73
3024.71	155	2441.34			2109.01	2973.66	2615.24	2354.37	1464.42	1703.42	2804.56	2945.09			2934.91		1898.35	3015.81	3024.71	2509.99	1218.34	2505.83	2932.07	2778.98	2453.16	2314.02	2507.53		2021.62		1134.91	2835.17	2940.15	2922.15	2731.81		2766.79	2607.48	2256.39	2933.9	1125.71			2868.2	3014.89	2196.98	573.464	2916.07	2828.73
3015.81	156	2441.34			2109.01	2973.66	2615.24	2354.37	1464.42	1703.42	2804.56	2945.09			2934.91		1898.35	3015.81	2138.79	2509.99	1218.34	2505.83	2932.07	2778.98	2453.16	2314.02	2507.53		2021.62		1134.91	2835.17	2940.15	2922.15	2731.81		2766.79	2607.48	2256.39	2933.9	1125.71			2868.2	3014.89	2196.98	573.464	2916.07	2828.73
3014.89	157	2441.34			2109.01	2973.66	2615.24	2354.37	1464.42	1703.42	2804.56	2945.09			2934.91		1898.35	1741.18	2138.79	2509.99	1218.34	2505.83	2932.07	2778.98	2453.16	2314.02	2507.53		2021.62		1134.91	2835.17	2940.15	2922.15	2731.81		2766.79	2607.48	2256.39	2933.9	1125.71			2868.2	3014.89	2196.98	573.464	2916.07	2828.73
2973.66	158	2441.34			2109.01	2973.66	2615.24	2354.37	1464.42	1703.42	2804.56	2945.09			2934.91		1898.35	1741.18	2138.79	2509.99	1218.34	2505.83	2932.07	2778.98	2453.16	2314.02	2507.53		2021.62		1134.91	2835.17	2940.15	2922.15	2731.81		2766.79	2607.48	2256.39	2933.9	1125.71			2868.2	2851.8	2196.98	573.464	2916.07	2828.73
2945.09	159	2441.34			2109.01	2865.49	2615.24	2354.37	1464.42	1703.42	2804.56	2945.09			2934.91		1898.35	1741.18	2138.79	2509.99	1218.34	2505.83	2932.07	2778.98	2453.16	2314.02	2507.53		2021.62		1134.91	2835.17	2940.15	2922.15	2731.81		2766.79	2607.48	2256.39	2933.9	1125.71			2868.2	2851.8	2196.98	573.464	2916.07	2828.73
2940.15	160	2441.34			2109.01	2865.49	2615.24	2354.37	1464.42	1703.42	2804.56				2934.91		1898.35	1741.18	2138.79	2509.99	1218.34	2505.83	2932.07	2778.98	2453.16	2314.02	2507.53		2021.62		1134.91	2835.17	2940.15	2922.15	2731.81		2766.79	2607.48	2256.39	2933.9	1125.71			2868.2	2851.8	2196.98	573.464	2916.07	2828.73
2934.91	161	2441.34			2109.01	2865.49	2615.24	2354.37	1464.42	1703.42	2804.56				2934.91		1898.35	1741.18	2138.79	2509.99	1218.34	2505.83	2932.07	2778.98	2453.16	2314.02	2507.53		2021.62		1134.91	2835.17	1697.5	2922.15	2731.81		2766.79	2607.48	2256.39	2933.9	1125.71			2868.2	2851.8	2196.98	573.464	2916.07	2828.73
2933.9	162	2441.34			2109.01	2865.49	2615.24	2354.37	1464.42	1703.42	2804.56						1898.35	1741.18	2138.79	2509.99	1218.34	2505.83	2932.07	2778.98	2453.16	2314.02	2507.53		2021.62		1134.91	2835.17	1697.5	2922.15	2731.81		2766.79	2607.48	2256.39	2933.9	1125.71			2868.2	2851.8	2196.98	573.464	2916.07	2828.73
2932.07	163	2441.34			2109.01	2865.49	2615.24	2354.37	1464.42	1703.42	2804.56						1898.35	1741.18	2138.79	2509.99	1218.34	2505.83	2932.07	2778.98	2453.16	2314.02	2507.53		2021.62		1134.91	2835.17	1697.5	2922.15	2731.81		2766.79	2607.48	2256.39	2624.16	1125.71			2868.2	2851.8	2196.98	573.464	2916.07	2828.73
2922.15	164	2441.34			2109.01	2865.49	2615.24	2354.37	1464.42	1703.42	2804.56						1898.35	1741.18	2138.79	2509.99	1218.34	2505.83	2271.17	2778.98	2453.16	2314.02	2507.53		2021.62		1134.91	2835.17	1697.5	2922.15	2731.81		2766.79	2607.48	2256.39	2624.16	1125.71			2868.2	2851.8	2196.98	573.464	2916.07	2828.73
2916.07	165	2441.34			2109.01	2865.49	2615.24	2354.37	1464.42	1703.42	2804.56						1898.35	1741.18	2138.79	2509.99	1218.34	2505.83	2271.17	2778.98	2453.16	2314.02	2507.53		2021.62		1134.91	2835.17	1697.5	2720.38	2731.81		2766.79	2607.48	2256.39	2624.16	1125.71			2868.2	2851.8	2196.98	573.464	2916.07	2828.73
2868.2	166	2441.34			2109.01	2865.49	2615.24	2354.37	1464.42	1703.42	2804.56						1898.35	1741.18	2138.79	2509.99	1218.34	2505.83	2271.17	2778.98	2453.16	2314.02	2507.53		2021.62		1134.91	2835.17	1697.5	2720.38	2731.81		2766.79	2607.48	2256.39	2624.16	1125.71			2868.2	2851.8	2196.98	573.464	2464.53	2828.73
2865.49	167	2441.34			2109.01	2865.49	2615.24	2354.37	1464.42	1703.42	2804.56						1898.35	1741.18	2138.79	2509.99	1218.34	2505.83	2271.17	2778.98	2453.16	2314.02	2507.53		2021.62		1134.91	2835.17	1697.5	2720.38	2731.81		2766.79	2607.48	2256.39	2624.16	1125.71			2341.88	2851.8	2196.98	573.464	2464.53	2828.73
2851.8	168	2441.34			2109.01	2764.92	2615.24	2354.37	1464.42	1703.42	2804.56						1898.35	1741.18	2138.79	2509.99	1218.34	2505.83	2271.17	2778.98	2453.16	2314.02	2507.53		2021.62		1134.91	2835.17	1697.5	2720.38	2731.81		2766.79	2607.48	2256.39	2624.16	1125.71			2341.88	2851.8	2196.98	573.464	2464.53	2828.73
2835.17	169	2441.34			2109.01	2764.92	2615.24	2354.37	1464.42	1703.42	2804.56						1898.35	1741.18	2138.79	2509.99	1218.34	2505.83	2271.17	2778.98	2453.16	2314.02	2507.53		2021.62		1134.91	2835.17	1697.5	2720.38	2731.81		2766.79	2607.48	2256.39	2624.16	1125.71			2341.88	2705.45	2196.98	573.464	2464.53	2828.73
2828.73	170	2441.34			2109.01	2764.92	2615.24	2354.37	1464.42	1703.42	2804.56						1898.35	1741.18	2138.79	2509.99	1218.34	2505.83	2271.17	2778.98	2453.16	2314.02	2507.53		2021.62		1134.91	2455.33	1697.5	2720.38	2731.81		2766.79	2607.48	2256.39	2624.16	1125.71			2341.88	2705.45	2196.98	573.464	2464.53	2828.73
2804.56	171	2441.34			2109.01	2764.92	2615.24	2354.37	1464.42	1703.42	2804.56						1898.35	1741.18	2138.79	2509.99	1218.34	2505.83	2271.17	2778.98	2453.16	2314.02	2507.53		2021.62		1134.91	2455.33	1697.5	2720.38	2731.81		2766.79	2607.48	2256.39	2624.16	1125.71			2341.88	2705.45	2196.98	573.464	2464.53	2191.12
2778.98	172	2441.34			2109.01	2764.92	2615.24	2354.37	1464.42	1703.42	2596.52						1898.35	1741.18	2138.79	2509.99	1218.34	2505.83	2271.17	2778.98	2453.16	2314.02	2507.53		2021.62		1134.91	2455.33	1697.5	2720.38	2731.81		2766.79	2607.48	2256.39	2624.16	1125.71			2341.88	2705.45	2196.98	573.464	2464.53	2191.12
2766.79	173	2441.34			2109.01	2764.92	2615.24	2354.37	1464.42	1703.42	2596.52						1898.35	1741.18	2138.79	2509.99	1218.34	2505.83	2271.17	2450.83	2453.16	2314.02	2507.53		2021.62		1134.91	2455.33	1697.5	2720.38	2731.81		2766.79	2607.48	2256.39	2624.16	1125.71			2341.88	2705.45	2196.98	573.464	2464.53	2191.12
2764.92	174	2441.34			2109.01	2764.92	2615.24	2354.37	1464.42	1703.42	2596.52						1898.35	1741.18	2138.79	2509.99	1218.34	2505.83	2271.17	2450.83	2453.16	2314.02	2507.53		2021.62		1134.91	2455.33	1697.5	2720.38	2731.81		2474.69	2607.48	2256.39	2624.16	1125.71			2341.88	2705.45	2196.98	573.464	2464.53	2191.12
2731.81	175	2441.34			2109.01	2671.16	2615.24	2354.37	1464.42	1703.42	2596.52						1898.35	1741.18	2138.79	2509.99	1218.34	2505.83	2271.17	2450.83	2453.16	2314.02	2507.53		2021.62		1134.91	2455.33	1697.5	2720.38	2731.81		2474.69	2607.48	2256.39	2624.16	1125.71			2341.88	2705.45	2196.98	573.464	2464.53	2191.12
2720.38	176	2441.34			2109.01	2671.16	2615.24	2354.37	1464.42	1703.42	2596.52						1898.35	1741.18	2138.79	2509.99	1218.34	2505.83	2271.17	2450.83	2453.16	2314.02	2507.53		2021.62		1134.91	2455.33	1697.5	2720.38	2409.23		2474.69	2607.48	2256.39	2624.16	1125.71			2341.88	2705.45	2196.98	573.464	2464.53	2191.12
2705.45	177	2441.34			2109.01	2671.16	2615.24	2354.37	1464.42	1703.42	2596.52						1898.35	1741.18	2138.79	2509.99	1218.34	2505.83	2271.17	2450.83	2453.16	2314.02	2507.53		2021.62		1134.91	2455.33	1697.5	2544.68	2409.23		2474.69	2607.48	2256.39	2624.16	1125.71			2341.88	2705.45	2196.98	573.464	2464.53	2191.12
2671.16	178	2441.34			2109.01	2671.16	2615.24	2354.37	1464.42	1703.42	2596.52						1898.35	1741.18	2138.79	2509.99	1218.34	2505.83	2271.17	2450.83	2453.16	2314.02	2507.53		2021.62		1134.91	2455.33	1697.5	2544.68	2409.23		2474.69	2607.48	2256.39	2624.16	1125.71			2341.88	2573.4	2196.98	573.464	2464.53	2191.12
2624.16	179	2441.34			2109.01	2583.56	2615.24	2354.37	1464.42	1703.42	2596.52						1898.35	1741.18	2138.79	2509.99	1218.34	2505.83	2271.17	2450.83	2453.16	2314.02	2507.53		2021.62		1134.91	2455.33	1697.5	2544.68	2409.23		2474.69	2607.48	2256.39	2624.16	1125.71			2341.88	2573.4	2196.98	573.464	2464.53	2191.12
2615.24	180	2441.34			2109.01	2583.56	2615.24	2354.37	1464.42	1703.42	2596.52						1898.35	1741.18	2138.79	2509.99	1218.34	2505.83	2271.17	2450.83	2453.16	2314.02	2507.53		2021.62		1134.91	2455.33	1697.5	2544.68	2409.23		2474.69	2607.48	2256.39	2373.65	1125.71			2341.88	2573.4	2196.98	573.464	2464.53	2191.12
2607.48	181	2441.34			2109.01	2583.56		2354.37	1464.42	1703.42	2596.52						1898.35	1741.18	2138.79	2509.99	1218.34	2505.83	2271.17	2450.83	2453.16	2314.02	2507.53		2021.62		1134.91	2455.33	1697.5	2544.68	2409.23		2474.69	2607.48	2256.39	2373.65	1125.71			2341.88	2573.4	2196.98	573.464	2464.53	2191.12
2596.52	182	2441.34			2109.01	2583.56		2354.37	1464.42	1703.42	2596.52						1898.35	1741.18	2138.79	2509.99	1218.34	2505.83	2271.17	2450.83	2453.16	2314.02	2507.53		2021.62		1134.91	2455.33	1697.5	2544.68	2409.23		2474.69	1843.77	2256.39	2373.65	1125.71			2341.88	2573.4	2196.98	573.464	2464.53	2191.12
2583.56	183	2441.34			2109.01	2583.56		2354.37	1464.42	1703.42	2417.23						1898.35	1741.18	2138.79	2509.99	1218.34	2505.83	2271.17	2450.83	2453.16	2314.02	2507.53		2021.62		1134.91	2455.33	1697.5	2544.68	2409.23		2474.69	1843.77	2256.39	2373.65	1125.71			2341.88	2573.4	2196.98	573.464	2464.53	2191.12
2573.4	184	2441.34			2109.01	2501.52		2354.37	1464.42	1703.42	2417.23						1898.35	1741.18	2138.79	2509.99	1218.34	2505.83	2271.17	2450.83	2453.16	2314.02	2507.53		2021.62		1134.91	2455.33	1697.5	2544.68	2409.23		2474.69	1843.77	2256.39	2373.65	1125.71			2341.88	2573.4	2196.98	573.464	2464.53	2191.12
2544.68	185	2441.34			2109.01	2501.52		2354.37	1464.42	1703.42	2417.23						1898.35	1741.18	2138.79	2509.99	1218.34	2505.83	2271.17	2450.83	2453.16	2314.02	2507.53		2021.62		1134.91	2455.33	1697.5	2544.68	2409.23		2474.69	1843.77	2256.39	2373.65	1125.71			2341.88	2453.64	2196.98	573.464	2464.53	2191.12
2509.99	186	2441.34			2109.01	2501.52		2354.37	1464.42	1703.42	2417.23						1898.35	1741.18	2138.79	2509.99	1218.34	2505.83	2271.17	2450.83	2453.16	2314.02	2507.53		2021.62		1134.91	2455.33	1697.5	2390.31	2409.23		2474.69	1843.77	2256.39	2373.65	1125.71			2341.88	2453.64	2196.98	573.464	2464.53	2191.12
2507.53	187	2441.34			2109.01	2501.52		2354.37	1464.42	1703.42	2417.23						1898.35	1741.18	2138.79	2049.4	1218.34	2505.83	2271.17	2450.83	2453.16	2314.02	2507.53		2021.62		1134.91	2455.33	1697.5	2390.31	2409.23		2474.69	1843.77	2256.39	2373.65	1125.71			2341.88	2453.64	2196.98	573.464	2464.53	2191.12
2505.83	188	2441.34			2109.01	2501.52		2354.37	1464.42	1703.42	2417.23						1898.35	1741.18	2138.79	2049.4	1218.34	2505.83	2271.17	2450.83	2453.16	2314.02	2047.39		2021.62		1134.91	2455.33	1697.5	2390.31	2409.23		2474.69	1843.77	2256.39	2373.65	1125.71			2341.88	2453.64	2196.98	573.464	2464.53	2191.12
2501.52	189	2441.34			2109.01	2501.52		2354.37	1464.42	1703.42	2417.23						1898.35	1741.18	2138.79	2049.4	1218.34	2117.81	2271.17	2450.83	2453.16	2314.02	2047.39		2021.62		1134.91	2455.33	1697.5	2390.31	2409.23		2474.69	1843.77	2256.39	2373.65	1125.71			2341.88	2453.64	2196.98	573.464	2464.53	2191.12
2474.69	190	2441.34			2109.01	2424.53		2354.37	1464.42	1703.42	2417.23						1898.35	1741.18	2138.79	2049.4	1218.34	2117.81	2271.17	2450.83	2453.16	2314.02	2047.39		2021.62		1134.91	2455.33	1697.5	2390.31	2409.23		2474.69	1843.77	2256.39	2373.65	1125.71			2341.88	2453.64	2196.98	573.464	2464.53	2191.12
2464.53	191	2441.34			2109.01	2424.53		2354.37	1464.42	1703.42	2417.23						1898.35	1741.18	2138.79	2049.4	1218.34	2117.81	2271.17	2450.83	2453.16	2314.02	2047.39		2021.62		1134.91	2455.33	1697.5	2390.31	2409.23		2238.44	1843.77	2256.39	2373.65	1125.71			2341.88	2453.64	2196.98	573.464	2464.53	2191.12
2455.33	192	2441.34			2109.01	2424.53		2354.37	1464.42	1703.42	2417.23						1898.35	1741.18	2138.79	2049.4	1218.34	2117.81	2271.17	2450.83	2453.16	2314.02	2047.39		2021.62		1134.91	2455.33	1697.5	2390.31	2409.23		2238.44	1843.77	2256.39	2373.65	1125.71			2341.88	2453.64	2196.98	573.464	2134.35	2191.12
2453.64	193	2441.34			2109.01	2424.53		2354.37	1464.42	1703.42	2417.23						1898.35	1741.18	2138.79	2049.4	1218.34	2117.81	2271.17	2450.83	2453.16	2314.02	2047.39		2021.62		1134.91		1697.5	2390.31	2409.23		2238.44	1843.77	2256.39	2373.65	1125.71			2341.88	2453.64	2196.98	573.464	2134.35	2191.12
2453.16	194	2441.34			2109.01	2424.53		2354.37	1464.42	1703.42	2417.23						1898.35	1741.18	2138.79	2049.4	1218.34	2117.81	2271.17	2450.83	2453.16	2314.02	2047.39		2021.62		1134.91		1697.5	2390.31	2409.23		2238.44	1843.77	2256.39	2373.65	1125.71			2341.88	2344.53	2196.98	573.464	2134.35	2191.12
2450.83	195	2441.34			2109.01	2424.53		2354.37	1464.42	1703.42	2417.23						1898.35	1741.18	2138.79	2049.4	1218.34	2117.81	2271.17	2450.83	1900.21	2314.02	2047.39		2021.62		1134.91		1697.5	2390.31	2409.23		2238.44	1843.77	2256.39	2373.65	1125.71			2341.88	2344.53	2196.98	573.464	2134.35	2191.12
2441.34	196	2441.34			2109.01	2424.53		2354.37	1464.42	1703.42	2417.23						1898.35	1741.18	2138.79	2049.4	1218.34	2117.81	2271.17	2192.09	1900.21	2314.02	2047.39		2021.62		1134.91		1697.5	2390.31	2409.23		2238.44	1843.77	2256.39	2373.65	1125.71			2341.88	2344.53	2196.98	573.464	2134.35	2191.12
2424.53	197	1993.34			2109.01	2424.53		2354.37	1464.42	1703.42	2417.23						1898.35	1741.18	2138.79	2049.4	1218.34	2117.81	2271.17	2192.09	1900.21	2314.02	2047.39		2021.62		1134.91		1697.5	2390.31	2409.23		2238.44	1843.77	2256.39	2373.65	1125.71			2341.88	2344.53	2196.98	573.464	2134.35	2191.12
2417.23	198	1993.34			2109.01	2352.14		2354.37	1464.42	1703.42	2417.23						1898.35	1741.18	2138.79	2049.4	1218.34	2117.81	2271.17	2192.09	1900.21	2314.02	2047.39		2021.62		1134.91		1697.5	2390.31	2409.23		2238.44	1843.77	2256.39	2373.65	1125.71			2341.88	2344.53	2196.98	573.464	2134.35	2191.12
2409.23	199	1993.34			2109.01	2352.14		2354.37	1464.42	1703.42	2261.11						1898.35	1741.18	2138.79	2049.4	1218.34	2117.81	2271.17	2192.09	1900.21	2314.02	2047.39		2021.62		1134.91		1697.5	2390.31	2409.23		2238.44	1843.77	2256.39	2373.65	1125.71			2341.88	2344.53	2196.98	573.464	2134.35	2191.12
2390.31	200	1993.34			2109.01	2352.14		2354.37	1464.42	1703.42	2261.11						1898.35	1741.18	2138.79	2049.4	1218.34	2117.81	2271.17	2192.09	1900.21	2314.02	2047.39		2021.62		1134.91		1697.5	2390.31	2154.88		2238.44	1843.77	2256.39	2373.65	1125.71			2341.88	2344.53	2196.98	573.464	2134.35	2191.12
2373.65	201	1993.34			2109.01	2352.14		2354.37	1464.42	1703.42	2261.11						1898.35	1741.18	2138.79	2049.4	1218.34	2117.81	2271.17	2192.09	1900.21	2314.02	2047.39		2021.62		1134.91		1697.5	2253.61	2154.88		2238.44	1843.77	2256.39	2373.65	1125.71			2341.88	2344.53	2196.98	573.464	2134.35	2191.12
2354.37	202	1993.34			2109.01	2352.14		2354.37	1464.42	1703.42	2261.11						1898.35	1741.18	2138.79	2049.4	1218.34	2117.81	2271.17	2192.09	1900.21	2314.02	2047.39		2021.62		1134.91		1697.5	2253.61	2154.88		2238.44	1843.77	2256.39	2166.83	1125.71			2341.88	2344.53	2196.98	573.464	2134.35	2191.12
2352.14	203	1993.34			2109.01	2352.14		1664.79	1464.42	1703.42	2261.11						1898.35	1741.18	2138.79	2049.4	1218.34	2117.81	2271.17	2192.09	1900.21	2314.02	2047.39		2021.62		1134.91		1697.5	2253.61	2154.88		2238.44	1843.77	2256.39	2166.83	1125.71			2341.88	2344.53	2196.98	573.464	2134.35	2191.12
2344.53	204	1993.34			2109.01	2283.95		1664.79	1464.42	1703.42	2261.11						1898.35	1741.18	2138.79	2049.4	1218.34	2117.81	2271.17	2192.09	1900.21	2314.02	2047.39		2021.62		1134.91		1697.5	2253.61	2154.88		2238.44	1843.77	2256.39	2166.83	1125.71			2341.88	2344.53	2196.98	573.464	2134.35	2191.12
2341.88	205	1993.34			2109.01	2283.95		1664.79	1464.42	1703.42	2261.11						1898.35	1741.18	2138.79	2049.4	1218.34	2117.81	2271.17	2192.09	1900.21	2314.02	2047.39		2021.62		1134.91		1697.5	2253.61	2154.88		2238.44	1843.77	2256.39	2166.83	1125.71			2341.88	2244.72	2196.98	573.464	2134.35	2191.12
2314.02	206	1993.34			2109.01	2283.95		1664.79	1464.42	1703.42	2261.11						1898.35	1741.18	2138.79	2049.4	1218.34	2117.81	2271.17	2192.09	1900.21	2314.02	2047.39		2021.62		1134.91		1697.5	2253.61	2154.88		2238.44	1843.77	2256.39	2166.83	1125.71			1979.25	2244.72	2196.98	573.464	2134.35	2191.12
2283.95	207	1993.34			2109.01	2283.95		1664.79	1464.42	1703.42	2261.11						1898.35	1741.18	2138.79	2049.4	1218.34	2117.81	2271.17	2192.09	1900.21		2047.39		2021.62		1134.91		1697.5	2253.61	2154.88		2238.44	1843.77	2256.39	2166.83	1125.71			1979.25	2244.72	2196.98	573.464	2134.35	2191.12
2271.17	208	1993.34			2109.01	2219.6		1664.79	1464.42	1703.42	2261.11						1898.35	1741.18	2138.79	2049.4	1218.34	2117.81	2271.17	2192.09	1900.21		2047.39		2021.62		1134.91		1697.5	2253.61	2154.88		2238.44	1843.77	2256.39	2166.83	1125.71			1979.25	2244.72	2196.98	573.464	2134.35	2191.12
2261.11	209	1993.34			2109.01	2219.6		1664.79	1464.42	1703.42	2261.11						1898.35	1741.18	2138.79	2049.4	1218.34	2117.81	1854.41	2192.09	1900.21		2047.39		2021.62		1134.91		1697.5	2253.61	2154.88		2238.44	1843.77	2256.39	2166.83	1125.71			1979.25	2244.72	2196.98	573.464	2134.35	2191.12
2256.39	210	1993.34			2109.01	2219.6		1664.79	1464.42	1703.42	2123.95						1898.35	1741.18	2138.79	2049.4	1218.34	2117.81	1854.41	2192.09	1900.21		2047.39		2021.62		1134.91		1697.5	2253.61	2154.88		2238.44	1843.77	2256.39	2166.83	1125.71			1979.25	2244.72	2196.98	573.464	2134.35	2191.12
2253.61	211	1993.34			2109.01	2219.6		1664.79	1464.42	1703.42	2123.95						1898.35	1741.18	2138.79	2049.4	1218.34	2117.81	1854.41	2192.09	1900.21		2047.39		2021.62		1134.91		1697.5	2253.61	2154.88		2238.44	1843.77		2166.83	1125.71			1979.25	2244.72	2196.98	573.464	2134.35	2191.12
2244.72	212	1993.34			2109.01	2219.6		1664.79	1464.42	1703.42	2123.95						1898.35	1741.18	2138.79	2049.4	1218.34	2117.81	1854.41	2192.09	1900.21		2047.39		2021.62		1134.91		1697.5	2131.7	2154.88		2238.44	1843.77		2166.83	1125.71			1979.25	2244.72	2196.98	573.464	2134.35	2191.12
2238.44	213	1993.34			2109.01	2219.6		1664.79	1464.42	1703.42	2123.95						1898.35	1741.18	2138.79	2049.4	1218.34	2117.81	1854.41	2192.09	1900.21		2047.39		2021.62		1134.91		1697.5	2131.7	2154.88		2238.44	1843.77		2166.83	1125.71			1979.25	2153.06	2196.98	573.464	2134.35	2191.12
2219.6	214	1993.34			2109.01	2219.6		1664.79	1464.42	1703.42	2123.95						1898.35	1741.18	2138.79	2049.4	1218.34	2117.81	1854.41	2192.09	1900.21		2047.39		2021.62		1134.91		1697.5	2131.7	2154.88		2043.41	1843.77		2166.83	1125.71			1979.25	2153.06	2196.98	573.464	2134.35	2191.12
2196.98	215	1993.34			2109.01			1664.79	1464.42	1703.42	2123.95						1898.35	1741.18	2138.79	2049.4	1218.34	2117.81	1854.41	2192.09	1900.21		2047.39		2021.62		1134.91		1697.5	2131.7	2154.88		2043.41	1843.77		2166.83	1125.71			1979.25	2153.06	2196.98	573.464	2134.35	2191.12
2192.09	216	1993.34			2109.01			1664.79	1464.42	1703.42	2123.95						1898.35	1741.18	2138.79	2049.4	1218.34	2117.81	1854.41	2192.09	1900.21		2047.39		2021.62		1134.91		1697.5	2131.7	2154.88		2043.41	1843.77		2166.83	1125.71			1979.25	2153.06	1268.43	573.464	2134.35	2191.12
2191.12	217	1993.34			2109.01			1664.79	1464.42	1703.42	2123.95						1898.35	1741.18	2138.79	2049.4	1218.34	2117.81	1854.41	1982.82	1900.21		2047.39		2021.62		1134.91		1697.5	2131.7	2154.88		2043.41	1843.77		2166.83	1125.71			1979.25	2153.06	1268.43	573.464	2134.35	2191.12
2166.83	218	1993.34			2109.01			1664.79	1464.42	1703.42	2123.95						1898.35	1741.18	2138.79	2049.4	1218.34	2117.81	1854.41	1982.82	1900.21		2047.39		2021.62		1134.91		1697.5	2131.7	2154.88		2043.41	1843.77		2166.83	1125.71			1979.25	2153.06	1268.43	573.464	2134.35
2154.88	219	1993.34			2109.01			1664.79	1464.42	1703.42	2123.95						1898.35	1741.18	2138.79	2049.4	1218.34	2117.81	1854.41	1982.82	1900.21		2047.39		2021.62		1134.91		1697.5	2131.7	2154.88		2043.41	1843.77		1993.2	1125.71			1979.25	2153.06	1268.43	573.464	2134.35
2153.06	220	1993.34			2109.01			1664.79	1464.42	1703.42	2123.95						1898.35	1741.18	2138.79	2049.4	1218.34	2117.81	1854.41	1982.82	1900.21		2047.39		2021.62		1134.91		1697.5	2131.7	1949.16		2043.41	1843.77		1993.2	1125.71			1979.25	2153.06	1268.43	573.464	2134.35
2138.79	221	1993.34			2109.01			1664.79	1464.42	1703.42	2123.95						1898.35	1741.18	2138.79	2049.4	1218.34	2117.81	1854.41	1982.82	1900.21		2047.39		2021.62		1134.91		1697.5	2131.7	1949.16		2043.41	1843.77		1993.2	1125.71			1979.25	2068.59	1268.43	573.464	2134.35
2134.35	222	1993.34			2109.01			1664.79	1464.42	1703.42	2123.95						1898.35	1741.18	1656.7	2049.4	1218.34	2117.81	1854.41	1982.82	1900.21		2047.39		2021.62		1134.91		1697.5	2131.7	1949.16		2043.41	1843.77		1993.2	1125.71			1979.25	2068.59	1268.43	573.464	2134.35
2131.7	223	1993.34			2109.01			1664.79	1464.42	1703.42	2123.95						1898.35	1741.18	1656.7	2049.4	1218.34	2117.81	1854.41	1982.82	1900.21		2047.39		2021.62		1134.91		1697.5	2131.7	1949.16		2043.41	1843.77		1993.2	1125.71			1979.25	2068.59	1268.43	573.464
2123.95	224	1993.34			2109.01			1664.79	1464.42	1703.42	2123.95						1898.35	1741.18	1656.7	2049.4	1218.34	2117.81	1854.41	1982.82	1900.21		2047.39		2021.62		1134.91		1697.5	2022.31	1949.16		2043.41	1843.77		1993.2	1125.71			1979.25	2068.59	1268.43	573.464
2117.81	225	1993.34			2109.01			1664.79	1464.42	1703.42	2002.47						1898.35	1741.18	1656.7	2049.4	1218.34	2117.81	1854.41	1982.82	1900.21		2047.39		2021.62		1134.91		1697.5	2022.31	1949.16		2043.41	1843.77		1993.2	1125.71			1979.25	2068.59	1268.43	573.464
2109.01	226	1993.34			2109.01			1664.79	1464.42	1703.42	2002.47						1898.35	1741.18	1656.7	2049.4	1218.34	1834.08	1854.41	1982.82	1900.21		2047.39		2021.62		1134.91		1697.5	2022.31	1949.16		2043.41	1843.77		1993.2	1125.71			1979.25	2068.59	1268.43	573.464
2068.59	227	1993.34			1491.3			1664.79	1464.42	1703.42	2002.47						1898.35	1741.18	1656.7	2049.4	1218.34	1834.08	1854.41	1982.82	1900.21		2047.39		2021.62		1134.91		1697.5	2022.31	1949.16		2043.41	1843.77		1993.2	1125.71			1979.25	2068.59	1268.43	573.464
2049.4	228	1993.34			1491.3			1664.79	1464.42	1703.42	2002.47						1898.35	1741.18	1656.7	2049.4	1218.34	1834.08	1854.41	1982.82	1900.21		2047.39		2021.62		1134.91		1697.5	2022.31	1949.16		2043.41	1843.77		1993.2	1125.71			1979.25		1268.43	573.464
2047.39	229	1993.34			1491.3			1664.79	1464.42	1703.42	2002.47						1898.35	1741.18	1656.7	1732.06	1218.34	1834.08	1854.41	1982.82	1900.21		2047.39		2021.62		1134.91		1697.5	2022.31	1949.16		2043.41	1843.77		1993.2	1125.71			1979.25		1268.43	573.464
2043.41	230	1993.34			1491.3			1664.79	1464.42	1703.42	2002.47						1898.35	1741.18	1656.7	1732.06	1218.34	1834.08	1854.41	1982.82	1900.21		1730.36		2021.62		1134.91		1697.5	2022.31	1949.16		2043.41	1843.77		1993.2	1125.71			1979.25		1268.43	573.464
2022.31	231	1993.34			1491.3			1664.79	1464.42	1703.42	2002.47						1898.35	1741.18	1656.7	1732.06	1218.34	1834.08	1854.41	1982.82	1900.21		1730.36		2021.62		1134.91		1697.5	2022.31	1949.16		1879.66	1843.77		1993.2	1125.71			1979.25		1268.43	573.464
2021.62	232	1993.34			1491.3			1664.79	1464.42	1703.42	2002.47						1898.35	1741.18	1656.7	1732.06	1218.34	1834.08	1854.41	1982.82	1900.21		1730.36		2021.62		1134.91		1697.5	1923.6	1949.16		1879.66	1843.77		1993.2	1125.71			1979.25		1268.43	573.464
2002.47	233	1993.34			1491.3			1664.79	1464.42	1703.42	2002.47						1898.35	1741.18	1656.7	1732.06	1218.34	1834.08	1854.41	1982.82	1900.21		1730.36				1134.91		1697.5	1923.6	1949.16		1879.66	1843.77		1993.2	1125.71			1979.25		1268.43	573.464
1993.34	234	1993.34			1491.3			1664.79	1464.42	1703.42							1898.35	1741.18	1656.7	1732.06	1218.34	1834.08	1854.41	1982.82	1900.21		1730.36				1134.91		1697.5	1923.6	1949.16		1879.66	1843.77		1993.2	1125.71			1979.25		1268.43	573.464
1993.2	235				1491.3			1664.79	1464.42	1703.42							1898.35	1741.18	1656.7	1732.06	1218.34	1834.08	1854.41	1982.82	1900.21		1730.36				1134.91		1697.5	1923.6	1949.16		1879.66	1843.77		1993.2	1125.71			1979.25		1268.43	573.464
1982.82	236				1491.3			1664.79	1464.42	1703.42							1898.35	1741.18	1656.7	1732.06	1218.34	1834.08	1854.41	1982.82	1900.21		1730.36				1134.91		1697.5	1923.6	1949.16		1879.66	1843.77		1845.34	1125.71			1979.25		1268.43	573.464
1979.25	237				1491.3			1664.79	1464.42	1703.42							1898.35	1741.18	1656.7	1732.06	1218.34	1834.08	1854.41	1810.06	1900.21		1730.36				1134.91		1697.5	1923.6	1949.16		1879.66	1843.77		1845.34	1125.71			1979.25		1268.43	573.464
1949.16	238				1491.3			1664.79	1464.42	1703.42							1898.35	1741.18	1656.7	1732.06	1218.34	1834.08	1854.41	1810.06	1900.21		1730.36				1134.91		1697.5	1923.6	1949.16		1879.66	1843.77		1845.34	1125.71			1714.08		1268.43	573.464
1923.6	239				1491.3			1664.79	1464.42	1703.42							1898.35	1741.18	1656.7	1732.06	1218.34	1834.08	1854.41	1810.06	1900.21		1730.36				1134.91		1697.5	1923.6	1779.33		1879.66	1843.77		1845.34	1125.71			1714.08		1268.43	573.464
1900.21	240				1491.3			1664.79	1464.42	1703.42							1898.35	1741.18	1656.7	1732.06	1218.34	1834.08	1854.41	1810.06	1900.21		1730.36				1134.91		1697.5	1834.08	1779.33		1879.66	1843.77		1845.34	1125.71			1714.08		1268.43	573.464
1898.35	241				1491.3			1664.79	1464.42	1703.42							1898.35	1741.18	1656.7	1732.06	1218.34	1834.08	1854.41	1810.06	1551.52		1730.36				1134.91		1697.5	1834.08	1779.33		1879.66	1843.77		1845.34	1125.71			1714.08		1268.43	573.464
1879.66	242				1491.3			1664.79	1464.42	1703.42								1741.18	1656.7	1732.06	1218.34	1834.08	1854.41	1810.06	1551.52		1730.36				1134.91		1697.5	1834.08	1779.33		1879.66	1843.77		1845.34	1125.71			1714.08		1268.43	573.464
1854.41	243				1491.3			1664.79	1464.42	1703.42								1741.18	1656.7	1732.06	1218.34	1834.08	1854.41	1810.06	1551.52		1730.36				1134.91		1697.5	1834.08	1779.33		1740.23	1843.77		1845.34	1125.71			1714.08		1268.43	573.464
1845.34	244				1491.3			1664.79	1464.42	1703.42								1741.18	1656.7	1732.06	1218.34	1834.08	1567.26	1810.06	1551.52		1730.36				1134.91		1697.5	1834.08	1779.33		1740.23	1843.77		1845.34	1125.71			1714.08		1268.43	573.464
1843.77	245				1491.3			1664.79	1464.42	1703.42								1741.18	1656.7	1732.06	1218.34	1834.08	1567.26	1810.06	1551.52		1730.36				1134.91		1697.5	1834.08	1779.33		1740.23	1843.77		1717.92	1125.71			1714.08		1268.43	573.464
1834.08	246				1491.3			1664.79	1464.42	1703.42								1741.18	1656.7	1732.06	1218.34	1834.08	1567.26	1810.06	1551.52		1730.36				1134.91		1697.5	1834.08	1779.33		1740.23			1717.92	1125.71			1714.08		1268.43	573.464
1834.08	247				1491.3			1664.79	1464.42	1703.42								1741.18	1656.7	1732.06	1218.34	1617.51	1567.26	1810.06	1551.52		1730.36				1134.91		1697.5	1834.08	1779.33		1740.23			1717.92	1125.71			1714.08		1268.43	573.464
1810.06	248				1491.3			1664.79	1464.42	1703.42								1741.18	1656.7	1732.06	1218.34	1617.51	1567.26	1810.06	1551.52		1730.36				1134.91		1697.5	1752.52	1779.33		1740.23			1717.92	1125.71			1714.08		1268.43	573.464
1779.33	249				1491.3			1664.79	1464.42	1703.42								1741.18	1656.7	1732.06	1218.34	1617.51	1567.26	1665.01	1551.52		1730.36				1134.91		1697.5	1752.52	1779.33		1740.23			1717.92	1125.71			1714.08		1268.43	573.464
1752.52	250				1491.3			1664.79	1464.42	1703.42								1741.18	1656.7	1732.06	1218.34	1617.51	1567.26	1665.01	1551.52		1730.36				1134.91		1697.5	1752.52	1636.75		1740.23			1717.92	1125.71			1714.08		1268.43	573.464
1741.18	251				1491.3			1664.79	1464.42	1703.42								1741.18	1656.7	1732.06	1218.34	1617.51	1567.26	1665.01	1551.52		1730.36				1134.91		1697.5	1677.91	1636.75		1740.23			1717.92	1125.71			1714.08		1268.43	573.464
1740.23	252				1491.3			1664.79	1464.42	1703.42									1656.7	1732.06	1218.34	1617.51	1567.26	1665.01	1551.52		1730.36				1134.91		1697.5	1677.91	1636.75		1740.23			1717.92	1125.71			1714.08		1268.43	573.464
1732.06	253				1491.3			1664.79	1464.42	1703.42									1656.7	1732.06	1218.34	1617.51	1567.26	1665.01	1551.52		1730.36				1134.91		1697.5	1677.91	1636.75		1620.07			1717.92	1125.71			1714.08		1268.43	573.464
1730.36	254				1491.3			1664.79	1464.42	1703.42									1656.7	1500	1218.34	1617.51	1567.26	1665.01	1551.52		1730.36				1134.91		1697.5	1677.91	1636.75		1620.07			1717.92	1125.71			1714.08		1268.43	573.464
1717.92	255				1491.3			1664.79	1464.42	1703.42									1656.7	1500	1218.34	1617.51	1567.26	1665.01	1551.52		1498.53				1134.91		1697.5	1677.91	1636.75		1620.07			1717.92	1125.71			1714.08		1268.43	573.464
1714.08	256				1491.3			1664.79	1464.42	1703.42									1656.7	1500	1218.34	1617.51	1567.26	1665.01	1551.52		1498.53				1134.91		1697.5	1677.91	1636.75		1620.07			1606.97	1125.71			1714.08		1268.43	573.464
1703.42	257				1491.3			1664.79	1464.42	1703.42									1656.7	1500	1218.34	1617.51	1567.26	1665.01	1551.52		1498.53				1134.91		1697.5	1677.91	1636.75		1620.07			1606.97	1125.71			1511.68		1268.43	573.464
1697.5	258				1491.3			1664.79	1464.42	983.47									1656.7	1500	1218.34	1617.51	1567.26	1665.01	1551.52		1498.53				1134.91		1697.5	1677.91	1636.75		1620.07			1606.97	1125.71			1511.68		1268.43	573.464
1677.91	259				1491.3			1664.79	1464.42	983.47									1656.7	1500	1218.34	1617.51	1567.26	1665.01	1551.52		1498.53				1134.91		1200.31	1677.91	1636.75		1620.07			1606.97	1125.71			1511.68		1268.43	573.464
1665.01	260				1491.3			1664.79	1464.42	983.47									1656.7	1500	1218.34	1617.51	1567.26	1665.01	1551.52		1498.53				1134.91		1200.31	1609.4	1636.75		1620.07			1606.97	1125.71			1511.68		1268.43	573.464
1664.79	261				1491.3			1664.79	1464.42	983.47									1656.7	1500	1218.34	1617.51	1567.26	1541.5	1551.52		1498.53				1134.91		1200.31	1609.4	1636.75		1620.07			1606.97	1125.71			1511.68		1268.43	573.464
1656.7	262				1491.3			1289.54	1464.42	983.47									1656.7	1500	1218.34	1617.51	1567.26	1541.5	1551.52		1498.53				1134.91		1200.31	1609.4	1636.75		1620.07			1606.97	1125.71			1511.68		1268.43	573.464
1636.75	263				1491.3			1289.54	1464.42	983.47									1352.69	1500	1218.34	1617.51	1567.26	1541.5	1551.52		1498.53				1134.91		1200.31	1609.4	1636.75		1620.07			1606.97	1125.71			1511.68		1268.43	573.464
1620.07	264				1491.3			1289.54	1464.42	983.47									1352.69	1500	1218.34	1617.51	1567.26	1541.5	1551.52		1498.53				1134.91		1200.31	1609.4			1620.07			1606.97	1125.71			1511.68		1268.43	573.464
1617.51	265				1491.3			1289.54	1464.42	983.47									1352.69	1500	1218.34	1617.51	1567.26	1541.5	1551.52		1498.53				1134.91		1200.31	1609.4						1606.97	1125.71			1511.68		1268.43	573.464
1609.4	266				1491.3			1289.54	1464.42	983.47									1352.69	1500	1218.34		1567.26	1541.5	1551.52		1498.53				1134.91		1200.31	1609.4						1606.97	1125.71			1511.68		1268.43	573.464
1606.97	267				1491.3			1289.54	1464.42	983.47									1352.69	1500	1218.34		1567.26	1541.5	1551.52		1498.53				1134.91		1200.31	1546.26						1606.97	1125.71			1511.68		1268.43	573.464
1567.26	268				1491.3			1289.54	1464.42	983.47									1352.69	1500	1218.34		1567.26	1541.5	1551.52		1498.53				1134.91		1200.31	1546.26						1509.48	1125.71			1511.68		1268.43	573.464
1551.52	269				1491.3			1289.54	1464.42	983.47									1352.69	1500	1218.34		1357.29	1541.5	1551.52		1498.53				1134.91		1200.31	1546.26						1509.48	1125.71			1511.68		1268.43	573.464
1546.26	270				1491.3			1289.54	1464.42	983.47									1352.69	1500	1218.34		1357.29	1541.5	1311.27		1498.53				1134.91		1200.31	1546.26						1509.48	1125.71			1511.68		1268.43	573.464
1541.5	271				1491.3			1289.54	1464.42	983.47									1352.69	1500	1218.34		1357.29	1541.5	1311.27		1498.53				1134.91		1200.31	1487.89						1509.48	1125.71			1511.68		1268.43	573.464
1511.68	272				1491.3			1289.54	1464.42	983.47									1352.69	1500	1218.34		1357.29	1435.06	1311.27		1498.53				1134.91		1200.31	1487.89						1509.48	1125.71			1511.68		1268.43	573.464
1509.48	273				1491.3			1289.54	1464.42	983.47									1352.69	1500	1218.34		1357.29	1435.06	1311.27		1498.53				1134.91		1200.31	1487.89						1509.48	1125.71			1352.08		1268.43	573.464
1500	274				1491.3			1289.54	1464.42	983.47									1352.69	1500	1218.34		1357.29	1435.06	1311.27		1498.53				1134.91		1200.31	1487.89						1423.15	1125.71			1352.08		1268.43	573.464
1498.53	275				1491.3			1289.54	1464.42	983.47									1352.69	1322.88	1218.34		1357.29	1435.06	1311.27		1498.53				1134.91		1200.31	1487.89						1423.15	1125.71			1352.08		1268.43	573.464
1491.3	276				1491.3			1289.54	1464.42	983.47									1352.69	1322.88	1218.34		1357.29	1435.06	1311.27		1321.58				1134.91		1200.31	1487.89						1423.15	1125.71			1352.08		1268.43	573.464
1487.89	277							1289.54	1464.42	983.47									1352.69	1322.88	1218.34		1357.29	1435.06	1311.27		1321.58				1134.91		1200.31	1487.89						1423.15	1125.71			1352.08		1268.43	573.464
1464.42	278							1289.54	1464.42	983.47									1352.69	1322.88	1218.34		1357.29	1435.06	1311.27		1321.58				1134.91		1200.31	1433.76						1423.15	1125.71			1352.08		1268.43	573.464
1435.06	279							1289.54		983.47									1352.69	1322.88	1218.34		1357.29	1435.06	1311.27		1321.58				1134.91		1200.31	1433.76						1423.15	1125.71			1352.08		1268.43	573.464
1433.76	280							1289.54		983.47									1352.69	1322.88	1218.34		1357.29	1342.38	1311.27		1321.58				1134.91		1200.31	1433.76						1423.15	1125.71			1352.08		1268.43	573.464
1423.15	281							1289.54		983.47									1352.69	1322.88	1218.34		1357.29	1342.38	1311.27		1321.58				1134.91		1200.31	1383.44						1423.15	1125.71			1352.08		1268.43	573.464
1383.44	282							1289.54		983.47									1352.69	1322.88	1218.34		1357.29	1342.38	1311.27		1321.58				1134.91		1200.31	1383.44						1346.17	1125.71			1352.08		1268.43	573.464
1357.29	283							1289.54		983.47									1352.69	1322.88	1218.34		1357.29	1342.38	1311.27		1321.58				1134.91		1200.31	1336.53						1346.17	1125.71			1352.08		1268.43	573.464
1352.69	284							1289.54		983.47									1352.69	1322.88	1218.34		1197.01	1342.38	1311.27		1321.58				1134.91		1200.31	1336.53						1346.17	1125.71			1352.08		1268.43	573.464
1352.08	285							1289.54		983.47										1322.88	1218.34		1197.01	1342.38	1311.27		1321.58				1134.91		1200.31	1336.53						1346.17	1125.71			1352.08		1268.43	573.464
1346.17	286							1289.54		983.47										1322.88	1218.34		1197.01	1342.38	1311.27		1321.58				1134.91		1200.31	1336.53						1346.17	1125.71					1268.43	573.464
1342.38	287							1289.54		983.47										1322.88	1218.34		1197.01	1342.38	1311.27		1321.58				1134.91		1200.31	1336.53						1277.09	1125.71					1268.43	573.464
1336.53	288							1289.54		983.47										1322.88	1218.34		1197.01	1260.94	1311.27		1321.58				1134.91		1200.31	1336.53						1277.09	1125.71					1268.43	573.464
1322.88	289							1289.54		983.47										1322.88	1218.34		1197.01	1260.94	1311.27		1321.58				1134.91		1200.31	1292.7						1277.09	1125.71					1268.43	573.464
1321.58	290							1289.54		983.47										1183.22	1218.34		1197.01	1260.94	1311.27		1321.58				1134.91		1200.31	1292.7						1277.09	1125.71					1268.43	573.464
1311.27	291							1289.54		983.47										1183.22	1218.34		1197.01	1260.94	1311.27						1134.91		1200.31	1292.7						1277.09	1125.71					1268.43	573.464
1292.7	292							1289.54		983.47										1183.22	1218.34		1197.01	1260.94	1135.59						1134.91		1200.31	1292.7						1277.09	1125.71					1268.43	573.464
1289.54	293							1289.54		983.47										1183.22	1218.34		1197.01	1260.94	1135.59						1134.91		1200.31	1251.65						1277.09	1125.71					1268.43	573.464
1277.09	294							1052.91		983.47										1183.22	1218.34		1197.01	1260.94	1135.59						1134.91		1200.31	1251.65						1277.09	1125.71					1268.43	573.464
1268.43	295							1052.91		983.47										1183.22	1218.34		1197.01	1260.94	1135.59						1134.91		1200.31	1251.65						1214.75	1125.71					1268.43	573.464
1260.94	296							1052.91		983.47										1183.22	1218.34		1197.01	1260.94	1135.59						1134.91		1200.31	1251.65						1214.75	1125.71						573.464
1251.65	297							1052.91		983.47										1183.22	1218.34		1197.01		1135.59						1134.91		1200.31	1251.65						1214.75	1125.71						573.464
1218.34	298							1052.91		983.47										1183.22	1218.34		1197.01		1135.59						1134.91		1200.31	1213.13						1214.75	1125.71						573.464
1214.75	299							1052.91		983.47										1183.22	703.412		1197.01		1135.59						1134.91		1200.31	1213.13						1214.75	1125.71						573.464
1213.13	300							1052.91		983.47										1183.22	703.412		1197.01		1135.59						1134.91		1200.31	1213.13						1158.22	1125.71						573.464
1200.31	301							1052.91		983.47										1183.22	703.412		1197.01		1135.59						1134.91		1200.31	1176.91						1158.22	1125.71						573.464
1197.01	302							1052.91		983.47										1183.22	703.412		1197.01		1135.59						1134.91			1176.91						1158.22	1125.71						573.464
1183.22	303							1052.91		983.47										1183.22	703.412		1070.64		1135.59						1134.91			1176.91						1158.22	1125.71						573.464
1176.91	304							1052.91		983.47										1070.26	703.412		1070.64		1135.59						1134.91			1176.91						1158.22	1125.71						573.464
1158.22	305							1052.91		983.47										1070.26	703.412		1070.64		1135.59						1134.91			1142.79						1158.22	1125.71						573.464
1142.79	306							1052.91		983.47										1070.26	703.412		1070.64		1135.59						1134.91			1142.79						1106.72	1125.71						573.464
1135.59	307							1052.91		983.47										1070.26	703.412		1070.64		1135.59						1134.91			1110.59						1106.72	1125.71						573.464
1134.91	308							1052.91		983.47										1070.26	703.412		1070.64		1001.5						1134.91			1110.59						1106.72	1125.71						573.464
1125.71	309							1052.91		983.47										1070.26	703.412		1070.64		1001.5									1110.59						1106.72	1125.71						573.464
1110.59	310							1052.91		983.47										1070.26	703.412		1070.64		1001.5									1110.59						1106.72	649.931						573.464
1106.72	311							1052.91		983.47										1070.26	703.412		1070.64		1001.5									1080.16						1106.72	649.931						573.464
1080.16	312							1052.91		983.47										1070.26	703.412		1070.64		1001.5									1080.16						1059.6	649.931						573.464
1070.64	313							1052.91		983.47										1070.26	703.412		1070.64		1001.5									1051.35						1059.6	649.931						573.464
1070.26	314							1052.91		983.47										1070.26	703.412		968.432		1001.5									1051.35						1059.6	649.931						573.464
1059.6	315							1052.91		983.47											703.412		968.432		1001.5									1051.35						1059.6	649.931						573.464
1052.91	316							1052.91		983.47											703.412		968.432		1001.5									1051.35						1016.33	649.931						573.464
1051.35	317							889.867		983.47											703.412		968.432		1001.5									1051.35						1016.33	649.931						573.464
1024.03	318							889.867		983.47											703.412		968.432		1001.5									1024.03						1016.33	649.931						573.464
1016.33	319							889.867		983.47											703.412		968.432		1001.5									998.105						1016.33	649.931						573.464
1001.5	320							889.867		983.47											703.412		968.432		1001.5									998.105						976.462	649.931						573.464
998.105	321							889.867		983.47											703.412		968.432		895.768									998.105						976.462	649.931						573.464
983.47	322							889.867		983.47											703.412		968.432		895.768									973.457						976.462	649.931						573.464
976.462	323							889.867		695.418											703.412		968.432		895.768									973.457						976.462	649.931						573.464
973.457	324							889.867		695.418											703.412		968.432		895.768									973.457						939.601	649.931						573.464
968.432	325							889.867		695.418											703.412		968.432		895.768									949.997						939.601	649.931						573.464
949.997	326							889.867		695.418											703.412		884.053		895.768									949.997						939.601	649.931						573.464
939.601	327							889.867		695.418											703.412		884.053		895.768									927.641						939.601	649.931						573.464
[truncated: 3 more columns]
